# Supplementary material for: Clinical values of FDG PET in polymyositis and dermatomyositis syndromes: imaging of skeletal muscle inflammation
Source: PubMed Central journal article supplement — BMJ Open. 2015 Jan 10;5(1):e006763. doi: 10.1136/bmjopen-2014-006763 (PMC4298089; doi:10.1136/bmjopen-2014-006763), 2015-01-10
Supplement: bmjopen-2014-006763.draft_revisions.pdf [file bmjopen-2014-006763.draft_revisions.pdf]

# BMJ Open

## Clinical values of FDG PET in polymyositis and dermatomyositis syndromes: imaging of skeletal muscle inflammation

|                                 |                                                                                                                                                                                                                                                                                                                                                                                                                                                                                                                                                                                                                                                                                   |
|---------------------------------|-----------------------------------------------------------------------------------------------------------------------------------------------------------------------------------------------------------------------------------------------------------------------------------------------------------------------------------------------------------------------------------------------------------------------------------------------------------------------------------------------------------------------------------------------------------------------------------------------------------------------------------------------------------------------------------|
| Journal:                        | <i>BMJ Open</i>                                                                                                                                                                                                                                                                                                                                                                                                                                                                                                                                                                                                                                                                   |
| Manuscript ID:                  | bmjopen-2014-006763                                                                                                                                                                                                                                                                                                                                                                                                                                                                                                                                                                                                                                                               |
| Article Type:                   | Research                                                                                                                                                                                                                                                                                                                                                                                                                                                                                                                                                                                                                                                                          |
| Date Submitted by the Author:   | 28-Sep-2014                                                                                                                                                                                                                                                                                                                                                                                                                                                                                                                                                                                                                                                                       |
| Complete List of Authors:       | Tateyama, Maki; Tohoku University School of Medicine, Department of Neurology<br>Fujihara, Kazuo; Tohoku University School of Medicine, Department of Neurology; Tohoku University Graduate School of Medicine, Multiple Sclerosis Therapeutics<br>Misu, Tatsuro; Tohoku University Graduate School of Medicine, Multiple Sclerosis Therapeutics; Tohoku University Graduate School of Medicine, Neurology<br>Arai, Akira; Tohoku University School of Medicine, Department of Diagnostic Radiology<br>Kaneta, Tomohiro; Tohoku University School of Medicine, Department of Diagnostic Radiology<br>Aoki, Masashi; Tohoku University School of Medicine, Department of Neurology |
| <b>Primary Subject Heading</b>: | Neurology                                                                                                                                                                                                                                                                                                                                                                                                                                                                                                                                                                                                                                                                         |
| Secondary Subject Heading:      | Radiology and imaging, Rheumatology                                                                                                                                                                                                                                                                                                                                                                                                                                                                                                                                                                                                                                               |
| Keywords:                       | Neuroradiology < RADIOLOGY & IMAGING, IMMUNOLOGY, HISTOPATHOLOGY, Neurology < INTERNAL MEDICINE, Rheumatology < INTERNAL MEDICINE                                                                                                                                                                                                                                                                                                                                                                                                                                                                                                                                                 |

SCHOLARONE™  
Manuscripts

1  
2  
3  
4  
5  
6 Clinical values of FDG PET in polymyositis and dermatomyositis syndromes: imaging of skeletal  
7  
8 muscle inflammation  
9

10  
11  
12  
13  
14 Maki Tateyama<sup>1,2</sup>, Kazuo Fujihara<sup>1</sup>, Tatsuro Misu<sup>1</sup>, Akira Arai<sup>3</sup>, Tomohiro Kaneta<sup>3</sup>, Masashi Aoki<sup>1</sup>  
15  
16

17  
18  
19 <sup>1</sup>Department of Neurology, Tohoku University School of Medicine  
20

21 <sup>2</sup>Department of Neurology, Iwate National Hospital  
22

23 <sup>3</sup>Department of Diagnostic Radiology, Tohoku University School of Medicine  
24  
25  
26  
27  
28  
29

30 Corresponding author  
31

32 Maki Tateyama  
33

34 Department of Neurology, Tohoku University School of Medicine  
35

36 1-1 Seiryomachi, Aoba-ku, Sendai 980-8574, Japan  
37

38 Tel: +81-22-717-7189  
39

40 Fax: +81-22-717-7192  
41  
42  
43  
44

45 Keywords: inflammatory myopathies, polymyositis, dermatomyositis, FDG PET, FDG PET/CT,  
46

47 MRI  
48  
49  
50

51 Word count: text, 3328 words; abstract, 253 words; 1 table, 4 figures, 25 references  
52  
53  
54  
55  
56  
57  
58  
59  
60

**ABSTRACT**

**Objectives:** [ $^{18}\text{F}$ ] fluorodeoxyglucose positron emission tomography (FDG PET), a standard tool for evaluating malignancies, can also detect inflammatory lesions. However, its use in evaluating muscle lesions in polymyositis and dermatomyositis syndromes (PM/DM) has not been established.

**Methods:** Thirty-three patients with PM/DM who had undergone FDG PET were retrospectively analyzed. FDG uptake was visually evaluated (visually identified FDG uptake: vFDG) in 16 regions of the body. We also calculated the maximum standardized uptake value (SUVmax) in four limbs of patients with PM/DM as well as in 22 patients with amyotrophic lateral sclerosis (ALS), whose disabilities were similar. In 24 patients with PM/DM, the findings of MRI and FDG PET were compared.

**Results:** vFDG was observed in over the two-thirds of the PM/DM patients in multiple muscle lesions with varying distributions, most of them were symmetrical. Numbers of vFDG-positive regions were correlated with mean SUVmax in four limbs ( $p < 0.0001$ ). Histological grades of biopsied muscles and serum creatine kinase levels were higher in the patients with more than two vFDG-positive regions than in those with two or less vFDG-positive regions ( $p < 0.05$ ). While the inflamed muscles showed diffuse signal abnormality using MRI, FDG uptake was more localized and often inside the muscles. Compared with ALS, SUVmax was significantly higher in PM/DM ( $p < 0.0001$ ) and showed a striking correlation in the bilateral muscle reflecting symmetrical muscle involvement in PM/DM.

**Conclusions:** FDG PET enables us to evaluate skeletal muscle comprehensively, which can improve clinical practice as well as provide insight into pathomechanism of PM/DM.

**Strength and limitation of this study**

This is the first study investigating FDG PET in muscles of polymyositis dermatomyositis syndromes comprehensively by two methods; visual evaluation and SUV measurement. The study demonstrated usefulness of visual assessment which can be used in clinical practice.

The limitation of the study is that this is a retrospective study. The patients underwent FDG PET for detection of occult cancer and the imaging range was therefore from the head to the middle of the thighs. Information on difference in FDG PET findings between polymyositis dermatomyositis syndromes and non-inflammatory myopathies was not obtained.

## INTRODUCTION

Idiopathic inflammatory myopathies are a heterogeneous group of disorders characterized clinically by progressive proximal muscle weakness and pathologically by mononuclear cell infiltration and fiber necrosis in muscles. Polymyositis (PM), dermatomyositis (DM), and inclusion body myositis are the representative phenotypes.<sup>1</sup> Both PM and DM are thought to be immune-mediated disorders, which can be successfully treated if they are properly managed. In contrast, in inclusion body myositis, degenerative processes also play an equal or greater role and effective treatments remain to be elucidated.<sup>2</sup> Patients with PM and DM syndromes (PM/DM) may present with other organ involvement such as interstitial lung disease.<sup>3,4</sup> They may also evolve with other collagen diseases and malignancies.<sup>4,5</sup> In addition, the extent and pattern of muscle involvement are variable. PM/DM can present prominent truncal muscle weakness or preferential involvement of respiratory muscles.<sup>6,7</sup> Thus, it is essential to systemically diagnose and evaluate patients with PM/DM.

[<sup>18</sup>F] fluorodeoxyglucose positron emission tomography (FDG PET) is a standard tool for detecting malignancies. FDG also accumulates in inflammatory lesions where glucose-consuming inflammatory cells infiltrate.<sup>8</sup> FDG PET is useful for diagnosing systemic inflammatory diseases including collagen vascular disorders such as rheumatoid arthritis, vasculitis, and polymyalgia rheumatica.<sup>9-11</sup> In PM/DM, only a limited number of studies have demonstrated that FDG PET detects inflammatory muscle lesions. Owada et al. visually assessed FDG uptake (FDG uptake that was equal to or more than that of the liver) in proximal muscles using FDG PET in 24 patients with PM/DM. They found that increased FDG uptake was more frequent in patients with PM/DM than in controls (33% versus 2%).<sup>12</sup> Pipitone et al. measured the maximum standardized uptake value (SUVmax) in proximal muscles of four limbs and calculated the muscle/liver SUVmax ratio in 12 patients with PM/DM using FDG PET/computed tomography (CT). They showed that the proximal

1  
2  
3  
4  
5 muscle SUV ratio was higher in patients with PM/DM than in controls.<sup>13</sup> In these two studies,  
6  
7 increased FDG uptake in proximal muscles was not correlated with clinical parameters or MRI  
8  
9 findings. In contrast, Tanaka et al. measured the mean standardized uptake value (SUV) using FDG  
10  
11 PET/CT in 14 proximal muscle groups in 20 patients with PM/DM and demonstrated that increased  
12  
13 SUV in proximal muscles of the myositis group as well as the mean proximal muscle SUV was  
14  
15 correlated with serum creatine kinase (CK) and muscle strength.<sup>14</sup> They also found that local SUV  
16  
17 was correlated with degrees of inflammation in the muscle biopsies and weakness of the  
18  
19 corresponding muscles. However, their method using global SUV calculations may not be feasible  
20  
21 in daily clinical practice. For successful clinical application of FDG PET, a simple and reliable way  
22  
23 to assess inflammation in muscles is preferable.  
24  
25  
26

27  
28 In this study, we evaluated visually FDG PET findings in patients with PM/DM in detail and  
29  
30 determined the extent and pattern of inflammation in individual patients. We compared visually  
31  
32 evaluated FDG PET findings with SUVmax in proximal muscles as well as with clinical and  
33  
34 pathological findings. Furthermore we compared MRI findings with FDG uptake in same muscle  
35  
36 regions. We also compared SUVmax in proximal muscles between patients with PM/DM and those  
37  
38 with ALS.  
39  
40  
41

## 42 MATERIALS AND METHODS

### 43 Patients

44  
45  
46 Thirty-three patients with recent-onset PM/DM were enrolled in this study. They had undergone  
47  
48 FDG PET or FDG PET/CT for investigating malignancies before or shortly after receiving an  
49  
50 initial corticosteroid treatment from January 2009 to July 2013. They were identified by  
51  
52 retrospectively reviewing medical records in our department. Clinically they showed symmetrical  
53  
54 proximal muscle weakness, elevated serum muscle enzymes, and myositis-compatible  
55  
56  
57  
58  
59  
60

1  
2  
3  
4  
5  
6 electrophysiological findings.<sup>15</sup> Muscle biopsies were conducted in all patients in whom  
7  
8 inflammatory infiltrates and muscle fiber necrosis and/or expression of HLA class 1 on muscle  
9  
10 fibers were observed. A few patients showed either inflammatory infiltrates or muscle fiber necrosis.  
11  
12 Subsequent therapies with corticosteroid alone or additional immunomodulatory therapies were  
13  
14 effective in all but one patient who died before beginning the treatment. Clinical records, laboratory  
15  
16 data and muscle MRIs from each patient were collected. Patients with inclusion body myositis were  
17  
18 not included. We identified 22 patients with amyotrophic lateral sclerosis (ALS), who were  
19  
20 admitted our hospital for diagnosis and had undergone FDG PET/CT for the detection of occult  
21  
22 cancer. These patients were included in this study as disease controls. Eighteen patients fulfilled the  
23  
24 diagnostic criteria for clinically definite, clinically probable or clinically probable-laboratory  
25  
26 supported ALS according to the revised El Escorial criteria of the World Federation of Neurology.  
27  
28  
29 <sup>16</sup> Four patients showed only lower motor neuron symptoms, with exclusion of other diseases.  
30  
31 Degrees of disability in patients with PM/DM and those with ALS were similar; all these patients  
32  
33 were able to walk and performed activities of daily life independently, but with some difficulties.  
34  
35  
36 The study was approved by the Tohoku University School of Medicine ethics committee.  
37  
38  
39

#### 40 **FDG PET imaging**

41  
42 The patients fasted for a minimum of 4 h before the <sup>18</sup>F-FDG injection. Blood glucose levels  
43  
44 were measured and the patients whose blood glucose level was greater than 150 mg/dl were not  
45  
46 included in the study. After the injection of approximately 185 MBq (3.1 MBq/kg) of <sup>18</sup>F-FDG, the  
47  
48 patients rested on the bed for 1 hour. PET scan was then performed from the head to the mid-thigh  
49  
50 using a PET scanner (ECAT EXACT HR+, Siemens, Erlangen, Germany) or PET/CT scanner  
51  
52 (Biograph Duo or 40, Siemens, Erlangen, Germany). PET/CT scanners have been used since April  
53  
54 2009 and have replaced a dedicated PET scanner in our institute. FDG uptake was visually  
55  
56  
57  
58  
59  
60

1  
2  
3  
4  
5  
6 evaluated (visually identified FDG uptake, vFDG) in skeletal muscles using dedicated workstations  
7  
8 by two radiologists (AA, TK). FDG uptake was independently assessed in a blinded manner. vFDG  
9  
10 was evaluated in 16 regions that included the upper arms: shoulders: sternocleidomastoid muscles:  
11  
12 paraspinal muscles of cervical, thoracic, and lumbar levels: buttocks: and upper part of the thighs in  
13  
14 both sides (Figure 1). The regions that had an FDG uptake equal to or more than that of the blood  
15  
16 vessels in the mediastinum were considered positive (1+) <sup>17</sup> and those that had an FDG uptake  
17  
18 equal to or more than that of the liver were considered strongly positive (2+).<sup>12</sup> Scores given by the  
19  
20 two radiologists were added and the regions where total scores were two or more were judged as  
21  
22 vFDG positive. In addition, SUV was calculated in patients with PM/DM and in 22 patients with  
23  
24 ALS in biceps brachii, quadriceps femoris, and medial and posterior compartments of the thigh  
25  
26 (hamstrings, abductor magnus, gracilis) on both sides. In one patient with PM, SUV was not able to  
27  
28 calculate in biceps brachii, because sectional area of the muscle was insufficient to place ROI. The  
29  
30 region of interest (ROI: 20mm) was placed in the highest FDG uptake area in each muscle region.  
31  
32 SUV was calculated as both the maximum value (SUVmax) and mean value (SUVmean) of ROI.  
33  
34 The mean proximal muscles SUVmax (mean SUVmax) and mean proximal muscles SUVmean  
35  
36 (mean SUVmean) were calculated by averaging the values found in these six muscle regions.  
37  
38  
39  
40  
41  
42

### 43 **Muscle MRI**

44  
45 Muscle MRI images were acquired during a routine examination using a 1.5T Intera scanner  
46  
47 (Philips, Best, the Netherlands) before treatment. Results were assessed by experienced radiologists.  
48  
49 Abnormal signals in skeletal muscles were identified on T2-weighted images with fat suppression  
50  
51 (T2W/FS) or short tau inversion recovery (STIR) sequence with long TE. In the patients who were  
52  
53 also had undertaken gadolinium contrast-enhancement, the abnormal enhancement in the muscle  
54  
55 and/or muscle fascia was evaluated.  
56  
57  
58  
59  
60



## Muscle biopsy

Muscle biopsies were performed before treatment in all patients with PM/DM. The muscle was taken from the biceps brachii (26 patients), deltoid (three patients), quadriceps femoris (three patients), or gastrocnemius (one patient). Biopsied muscles were snap frozen and a routine histochemical study was conducted. The most affected lesions in the specimens were photographed with objective lens of 10-fold magnifications. Histological findings were assessed in a blinded manner by an experienced neurologist who was well versed in neuropathology (TM). The extent of mononuclear cell infiltration was graded as follows: 0, none or slight; 1, one focus of mononuclear cell infiltration; 2, more than one focus of mononuclear cell infiltration; and 3, diffuse mononuclear cell infiltration. Muscle fiber necrosis and regeneration were graded as follows: 0, none; 1, 1% or less of muscle fibers showed necrosis or regeneration; 2, more than 1% and no more than 10% of muscle fibers showed necrosis or regeneration; and 3, more than 10% of muscle fibers showed necrosis or regeneration. The total grading scores were calculated for each patient by adding the grade of mononuclear infiltration and the muscle fiber necrosis and regeneration grade.

## Statistical analysis

Statistical analysis was performed using JNP8 (SAS Institute Inc., Cary, NC, USA). Statistical significance was analyzed by Wilcoxon rank sum test (nonparametric test), Simple regression analysis, and Spearman rank correlation. Comparisons were considered to be statistically significant if  $p < 0.05$ .

## RESULTS

### Patient Characteristics

1  
2  
3  
4  
5  
6 A summary of the 33 patients with PM/DM (males 10, females 23; mean age  $56 \pm 17.9$   
7  
8 years) who underwent FDG PET (eight patients) or FDG PET/CT (25 patients) is shown in Table 1.  
9  
10 FDG PET was performed before any treatment in 25 patients. In eight patients, FDG PET was  
11  
12 performed soon after beginning corticosteroid treatment (2 to 9 days, mean 6.1 days). We  
13  
14 provisionally divided the patients into PM/DM with and without other collagen diseases. The latter  
15  
16 included DM and PM without other collagen diseases. Numbers of patients of each clinical group  
17  
18 and those of relevant clinicopathological classifications<sup>18</sup> in each clinical group (parenthesis) were  
19  
20 as follows: 11 patients with DM (four patients with definite DM, seven with probable DM), 11  
21  
22 patients with PM without other collagen diseases (nine patients with nonspecific myositis, one with  
23  
24 definite PM, and one with probable PM), and 11 patients with PM/DM with other collagen diseases  
25  
26 (eight patients with nonspecific myositis, two with probable PM, and one with definite PM). Two  
27  
28 patients with DM and one patient with PM without other collagen diseases were proven to have  
29  
30 malignancies. Abnormal FDG uptake was noted in the lung in several patients, and most of these  
31  
32 patients were diagnosed as having interstitial lung diseases. FDG uptake in the lymph nodes was  
33  
34 observed in 50% of patients with DM, 18.2% of patients with PM without other collagen diseases,  
35  
36 and 75% of patients with PM/DM with other collagen diseases.  
37  
38  
39  
40  
41  
42

#### 43 **Visual assessment of FDG uptake in skeletal muscles in patients with PM/DM**

44  
45 vFDG in skeletal muscles was observed in 21 out of 33 patients with PM/DM (63.6%). vFDG  
46  
47 was detected in multiple regions in 14 patients (42.4%) with various patterns (Table 1) and almost  
48  
49 symmetrical distribution. Shoulders and buttocks were the most frequent positive regions. A  
50  
51 fraction of patients with DM showed vFDG-positivity in most of the regions. A representative case  
52  
53 is shown in Figure 1. Numbers of vFDG-positive regions were correlated with the mean SUVmax  
54  
55 of four extremities ( $r = 0.86$ ,  $p < 0.0001$ ; Fig. 2A), implying that SUVmax in extremities could be  
56  
57  
58  
59  
60

1  
2  
3  
4  
5  
6  
7  
8  
9  
10  
11  
12  
13  
14  
15  
16  
17  
18  
19  
20  
21  
22  
23  
24  
25  
26  
27  
28  
29  
30  
31  
32  
33  
34  
35  
36  
37  
38  
39  
40  
41  
42  
43  
44  
45  
46  
47  
48  
49  
50  
51  
52  
53  
54  
55  
56  
57  
58  
59  
60

inferred by the extent of vFDG-positive regions. In addition, serum CK levels were higher in patients with more than two vFDG-positive regions than in those with two or less vFDG-positive regions ( $p = 0.0179$ ; Fig. 2B). The total histological scores were also higher in the patients with more than two vFDG-positive regions than in those with two or less vFDG-positive regions ( $p = 0.0127$ ; Fig. 2C). These findings suggest that the distribution of vFDG-positive regions could reflect clinical and pathological severities of PM/DM.

### **Relationships between SUV and clinicopathological findings in patients with PM/DM**

The mean SUVmax was not significantly correlated with serum CK levels or the duration of the illness. The mean SUVmean was higher in male patients than female patients, but not significant ( $p = 0.0715$ ). There were no significant differences between each DM, PM without other collagen diseases, and PM/DM with other collagen diseases. The degree of pathological findings was correlated with mean SUVmax ( $r = 0.60$ ,  $p = 0.0002$ ; Fig. 2D). The degree of pathological findings was also correlated with SUVmax in the biopsied muscles in the patients with PM/DM in whom biopsies were done in biceps brahii or quadriceps femoris ( $r = 0.52$ ,  $p = 0.005$ ).

### **Comparison of FDG PET and MR findings in PM/DM**

25 patients with PM/DM were undergone both FDG PET and muscle MRI. Muscle MRI was performed in the thighs (18 patients), upper arms (six patients) or shoulders (one patient). Among them, 20 patients had been judged as MRI positive. In the MRI-positive regions of each patient, vFDG was positive in four patients. There was no difference in SUVmax of the muscles between MRI-positive and MRI-negative muscles ( $p = 0.1537$ ; Fig. 2E). In contrast, SUVmax of relevant muscles was significantly higher in vFDG-positive patients than in vFDG-negative patients ( $p = 0.0076$ ; Fig. 2F). These findings suggested that MRI is a sensitive tool for detecting inflammatory

1  
2  
3  
4  
5  
6 edema. However, high signals in MRI might not simply reflect the degree of inflammation.

7  
8 The pattern of abnormal signals was different between FDG PET and MRI (Figs. 1 & 3). In  
9  
10 MRI, affected muscles showed a diffuse high signal, which may reflect inflammatory edema (Figs  
11  
12 1 & 3). In contrast, FDG uptake was more localized in each muscle in most patients. The highest  
13  
14 uptake was predominantly inside of the muscles, a few centimeters from the muscle surface.  
15

### 16 17 18 19 **SUVmax in skeletal muscles of patients with PM/DM and ALS**

20  
21 The mean SUVmax was higher in the patients with PM/DM than in those with ALS ( $1.463 \pm$   
22  
23  $0.483$  versus  $1.004 \pm 0.136$ ,  $p < 0.0001$ ; Fig. 4A). The mean SUVmean was also higher in the  
24  
25 patients with PM/DM ( $1.106 \pm 0.370$  versus  $0.733 \pm 0.139$ ,  $p < 0.0001$ ).  
26

27  
28 The SUVmax in the biceps brachii, quadriceps femoris, and medial and posterior  
29  
30 compartments of the thigh in both sides was compared. In patients with PM/DM, SUVmax of one  
31  
32 muscle region and that of another muscle region was correlated (biceps brachii versus medial and  
33  
34 posterior compartments of the thigh, quadriceps versus biceps brachii, quadriceps versus medial  
35  
36 and posterior compartments of the thigh). There was a striking correlation between the same  
37  
38 muscles on both sides (biceps brachii, quadriceps femoris, medial and posterior compartments of  
39  
40 the thigh). The scatter plots suggested symmetrical muscle involvement in PM/DM (Fig. 4B). Only  
41  
42 moderate symmetry of SUVmax was found in patients with ALS (Fig. 4C).  
43  
44  
45

### 46 47 **DISCUSSION**

48  
49 In the present study, we assessed skeletal muscles of patients with PM/DM using FDG PET  
50  
51 in two ways, visual assessment and SUV measurement. We found that the mean value of SUVmax  
52  
53 in four extremities of PM/DM patients was approximately 1.5 and the mean value of SUVmean in  
54  
55 four extremities was approximately 1.1. These results are consistent with those of previous  
56  
57  
58  
59  
60

1  
2  
3  
4  
5  
6 studies.<sup>13 14</sup> A major mechanism underlying the accumulation of FDG in the inflamed tissue is  
7  
8 uptake by metabolically active cells such as macrophages, young granulation tissue, and  
9  
10 fibroblasts.<sup>8 9</sup> Because FDG uptake in inflamed muscles is fairly moderate compared with that in  
11  
12 the neoplasm, setting an appropriate criterion for visual assessment is challenging. In a previous  
13  
14 study using liver, in which SUV was around 3, as a positivity criterion demonstrated that 33% of  
15  
16 patients with PM/DM patients had positive muscle regions.<sup>12</sup> In the present study, we chose the  
17  
18 mediastinum blood vessels, where SUV is approximately 2, as a positivity criterion for vFDG.<sup>17</sup>  
19  
20 We found that 63.6% of patients with PM/DM had positive muscle regions. In addition, we divided  
21  
22 the proximal body muscle in 16 regions, which enabled us to evaluate the extent and patterns of  
23  
24 vFDG-positive regions. We report that vFDG-positive muscle regions correlated with the serum CK  
25  
26 levels, histological grades, as well as meanSUVmax in four limbs. These findings suggest that  
27  
28 vFDG, using mediastinum blood vessels as the positivity criterion, is useful in the assessment of  
29  
30 systemic muscle lesions. In addition, the extent of vFDG-positive regions could be an indicator of  
31  
32 the disease activity in PM/DM.  
33  
34  
35

36 MRI is now widely used to diagnose and to determine biopsy sites in PM/DM.<sup>19 20</sup> Because  
37  
38 MRI detects inflammatory edema and FDG PET detects FDG uptake by metabolically active cells,  
39  
40 the images of the two modalities are different. MRI positivity was not correlated with SUVmax in  
41  
42 the same muscles in the present study. MRI can sensitively detect muscle edema, however, it is not  
43  
44 specific to inflammatory myopathies.<sup>21</sup> In MRI images, affected muscles often showed diffuse  
45  
46 abnormal signals. On the other hand, in FDG PET, although the sensitivity may be inferior to that  
47  
48 in MRI, FDG uptake was more localized and was frequently found deep inside each muscle.  
49  
50 Because FDG uptake is theoretically confined to metabolically active sites, the findings imply that  
51  
52 the pathology of the biopsied muscles may not present the most affected lesions. This may be a  
53  
54 possible reason why we only found a moderate correlation between grades of pathological findings  
55  
56  
57  
58  
59  
60

1  
2  
3  
4  
5  
6 and SUVmax of the corresponding muscles. Further investigation including the pathological  
7  
8 findings may be required to clarify the precise nature of abnormal signals in these two measures.  
9

10 Previous reports have shown that SUV in skeletal muscles is higher in patients with PM/DM  
11  
12 than in control patients without a disability.<sup>13 14</sup> Comparisons of SUV between patients with  
13  
14 PM/DM and disabled control patients have never been reported. ALS is characterized by  
15  
16 progressive muscle weakness caused by degeneration of upper and lower motor neurons. We found  
17  
18 that the mean SUVmax was significantly higher in patients with PM/DM patients than in those with  
19  
20 ALS. The findings suggest that FDG PET can distinguish between muscle weakness resulting from  
21  
22 muscle fiber destruction with inflammation and that resulting from neurogenic atrophy.  
23  
24

25 PM/DM is clinically characterized by symmetrical proximal muscle weakness.<sup>4</sup> In the  
26  
27 present study, we found a strong correlation between SUVmax of the same muscles on both sides  
28  
29 including bilateral quadriceps femoris, bilateral medial and posterior components of thighs, and  
30  
31 bilateral biceps brachii. The correlation coefficient was higher in quadriceps femoris on both sides  
32  
33 and medial and posterior components of thigh in both sides than in quadriceps femoris and medial  
34  
35 and posterior components of the same side of the legs. The findings verified statistically that the  
36  
37 inflammatory muscle damage progressed symmetrically in PM/DM, although muscle lesions are  
38  
39 often multifocal in each muscle. The current pathological mechanism of PM/DM based on  
40  
41 immunopathology cannot explain the symmetrical muscle damage in PM/DM.<sup>4 22</sup> Several possible  
42  
43 mechanisms may explain the symmetry, such as an involvement of anatomical factors, including  
44  
45 vasculatures and peripheral nerves, or some immune or physiological factors of the individual  
46  
47 muscles that could influence the extent of inflammation.  
48  
49  
50

51 The present study had several limitations. The study was retrospective and FDG PET was  
52  
53 performed to detect malignancies. The extent of the imaging range was therefore from the head to  
54  
55 the middle of the thighs. Thus evaluation of the thighs was limited; however, a negligible number  
56  
57  
58  
59  
60

1  
2  
3  
4  
5  
6 of false negatives in vFDG were most likely produced. In this study, we could not study whether  
7  
8 FDG uptake in skeletal muscles changed after immunomodulatory treatment, because only a few  
9  
10 patients underwent FDG PET twice or more. We could not compare FDG PET findings between  
11  
12 PM/DM patients and noninflammatory myopathies, such as muscular dystrophy.  
13

14  
15 In conclusion, our findings indicated the utility and convenience of FDG PET in clinical  
16  
17 characterization of PM/DM. The visual assessment of FDG uptake could be adopted in clinical  
18  
19 practice. The greatest advantage of FDG PET is screening the whole body in a single scan. We can  
20  
21 visually evaluate the extent and pattern of muscle inflammation systemically and include  
22  
23 structures that are not routinely screened by MRI. Apart from malignancies,<sup>23</sup> this methods can  
24  
25 also evaluate lung inflammation<sup>24</sup> and swelling of lymph nodes. In addition, semiquantitative  
26  
27 evaluation using SUV is useful for statistical analysis of muscle inflammation. On the other hand,  
28  
29 the disadvantages of FDG PET are considerable costs and exposure to ionizing radiation. It is  
30  
31 important to keep in mind that FDG uptake in muscles is influenced by hyperglycemia, uptake by  
32  
33 other organs, and voluntary or involuntary muscle movement during the uptake phase; thus,  
34  
35 careful examination is a prerequisite.<sup>25</sup> Although further prospective investigations in a larger  
36  
37 sample may be needed to examine cost effectiveness, addition of FDG PET to conventional  
38  
39 examinations may be useful for comprehensive diagnosis and management as well as  
40  
41 investigation of the pathological mechanism underlying PM/DM.  
42  
43  
44  
45  
46  
47  
48  
49  
50  
51  
52  
53  
54  
55  
56  
57  
58  
59  
60

**Acknowledgements**

We thank Risa Ando for technical assistance.

**Contributions** MT, KF and TK were involved in setup the study and writing the draft. TM was involved in the analysis of the muscle biopsies. TK and AA contributed to the visual evaluation of FDG PET. All the authors contributed to discussion of the data and reviewing and revising the manuscript.

**Funding**

This study was supported by JSPS KAKENHI Grant Number 25461265.

**Competing Interests**

None.

**Ethic approval**

Tohoku University School of Medicine ethical approval.

**Provenance and peer review**

Not commissioned; externally peer reviewed.

**Data sharing statement**

No additional data are available.



## REFERENCES

1. Lazarou IN, Guerne P-A. Classification, diagnosis, and management of idiopathic inflammatory myopathies. *J Rheumatol* 2013;40:550-64.
2. Machado P, Brady S, Hanna MG. Update in inclusion body myositis. *Curr Opin Rheumatol* 2013;25:763-71.
3. Vij R, Strek ME. Diagnosis and treatment of connective tissue disease-associated interstitial lung disease. *Chest* 2013;143:814-24.
4. Engel AG, Hohlfield R. The polymyositis and dermatomyositis syndromes. 1321-1366. In *Myology* 3<sup>rd</sup> ed. Engel AG, Franzini-Armstrong C. 2004 McGraw-Hill.
5. Tansley S, Gunawardena H. The evolving spectrum of polymyositis and dermatomyositis-moving towards clinicoserological syndromes: a critical review. *Clinic Rev Allerg Immunol* 2013. DOI 10.1007/s12016-013-8387-6.
6. Maeda MH, Tsuji S, Shimizu J. Inflammatory myopathies associated with anti-mitochondrial antibodies. *Brain* 2012;1767-77.
7. Tanaka K, Sato A, Kasuga K, et al. Chronic myositis with cardiomyopathy and respiratory failure associated with mild organ-specific autoimmune diseases. *Clin Rheumatol* 2007;26:1917-9.
8. Gotthardt M, Bleeker-Rovers CP, Boerman OC, et al. Imaging of inflammation by PET, conventional scintigraphy, and other imaging techniques. *J Nucl Med* 2010;51:1937-49.
9. Kubota K, Ito K, Morooka M, et al. FDG PET for rheumatoid arthritis: basic considerations and whole-body PET/CT. *Ann N Y Acad Sci* 2011;1228:29-38.
10. Fuchs M, Briel M, Daikeler T, et al. The impact of <sup>18</sup>F-FDG PET on the management of patients with suspected large vessel vasculitis. *Eur J Nucl Med Mol Imaging* 2012;39:344-53.
11. Yamashita H, Kubota K, Takahashi Y, et al. Whole-body fluorodeoxyglucose positron emission

- 1  
2  
3  
4  
5  
6 tomography/computed tomography in patients with active polymyalgia rheumatica: evidence  
7  
8 for distinctive bursitis and large-vessel vasculitis. *Mod Rheumatol* 2012;22:705-11.  
9
- 10 12. Owada T, Maezawa R, Kurasawa K, *et al.* Detection of inflammatory lesions by F-18  
11  
12 fluorodeoxyglucose positron emission tomography in patients with polymyositis and  
13  
14 dermatomyositis. *J Rheumatol* 2012;39:1659-65.  
15
- 16 13. Pipitone N, Versari A, Zuccoli G, *et al.* <sup>18</sup>F-fluorodeoxyglucose positron emission tomography  
17  
18 for the assessment of myositis: a case series. *Clin Exp Rheumatol* 2012;30:570-3.  
19
- 20 14. Tanaka S, Ikeda K, Uchiyama K, *et al.* [<sup>18</sup>F]FDG uptake in proximal muscles assessed by  
21  
22 PET/CT reflects both global and local muscular inflammation and provides useful information  
23  
24 in the management of patients with polymyositis/dermatomyositis. *Rheumatol* 2013;52:1271-8.  
25  
26
- 27 15. Bohan A, Peter JB. Polymyositis and dermatomyositis. *N Engl J Med* 1975;292:344-7.  
28
- 29 16. Brooks BR, Miller RG, Swash M, *et al.* El Escorial revisited: revised criteria for the diagnosis  
30  
31 of amyotrophic lateral sclerosis. *ALS other Motor Neuron Disord* 2000;1:293-9.  
32  
33
- 34 17. Sobic-Saranovic DP, Grozdic IT, Videnovic-Ivanov J, *et al.* Responsiveness of FDG PET/CT to  
35  
36 treatment of patients with active chronic sarcoidosis. *Clin Nucl Med* 2013;38:516-21.  
37
- 38 18. Hoogendijk JE, Amato AA, Lecky BR, *et al.* 119th ENMC international workshop: trial design  
39  
40 in adult idiopathic inflammatory myopathies, with the exception of inclusion body myositis,  
41  
42 10-12 October 2003, Naarden, The Netherland. *Neuromusc Disord* 2004;14:337-45.  
43  
44
- 45 19. Studýnková JT, Charvát F, Jarošová K, *et al.* The role of MRI in the assessment of  
46  
47 polymyositis and dermatomyositis. *Rheumatol* 2007;46:1174-9.  
48
- 49 20. Yao L, Gai N. Fat-corrected T2 measurement as a marker of active muscle disease in  
50  
51 inflammatory myopathy. *Am J Rheumatol* 2012;198:W475-81.  
52
- 53 21. Degardin A, Morillon D, Lacour A, *et al.* Morphologic imaging in muscular dystrophies and  
54  
55 inflammatory myopathies. *Skeletal Radiol* 2010;39:1219-27.  
56  
57  
58  
59  
60

- 1  
2  
3  
4  
5  
6 22. Hak AE, de Paepe B, de Bleecker JL, *et al.* Dermatomyositis and polymyositis: new treatment  
7 targets on the horizon. *Neth J Med* 2011;69:410-21.  
8  
9  
10 23. Selva-O'Callaghan A, Grau JM, Gámez-Cenzano C, *et al.* Conventional cancer screening  
11 versus PET/CT in dermatomyositis/polymyositis. *Am J Med* 2010;123:558-62.  
12  
13  
14 24. Morita Y, Kuwagata S, Kato N, *et al.* <sup>18</sup>F-FDG PET/CT useful for the early detection of rapidly  
15 progressive fatal interstitial lung disease in dermatomyositis. *Intern Med* 2012;51:1613-8.  
16  
17  
18 25. Jackson RS, Schlarman TC, Hubble WL, *et al.* Prevalence and patterns of physiologic muscle  
19 uptake detected with whole-body <sup>18</sup>F-FDG PET. *J Nucl Med Technol* 2006;34:29-33.  
20  
21  
22  
23  
24  
25  
26  
27  
28  
29  
30  
31  
32  
33  
34  
35  
36  
37  
38  
39  
40  
41  
42  
43  
44  
45  
46  
47  
48  
49  
50  
51  
52  
53  
54  
55  
56  
57  
58  
59  
60

**Figure legend**

**Figure 1.** FDG PET and MRI findings in a patient with dermatomyositis (Patient 11). Serial sections of FDG PET/CT (A). Using FDG uptake in mediastinum vessels as a positivity standard, positive regions were found in the body, including paraspinal muscles, shoulders, upper arms, and lumbar girdles, in a predominantly symmetric distribution. An FDG PET image of the upper arm level (B). Frontal view of an FDG PET image indicating FDG uptake in shoulders, upper arms, and iliopsoas (C). MRI of the thighs (D) showing high signal areas in bilateral quadriceps femoris (T2-weighted images with fat suppression).

**Figure 2.** Numbers of vFDG-positive muscle regions are correlated with the mean value of SUVmax in four extremities (A). Serum values of creatinine kinase (CK) are higher in patients with more than two vFDG-positive muscle regions than in those with two or less vFDG positive muscle regions (B). Total histological scores are higher in patients with more than two vFDG-positive muscle regions than in those with two or less vFDG-positive muscle regions (C). Mean values of SUVmax in four extremities are correlated with total histological scores (D). There are no difference in SUVmax in corresponding muscles between the muscles with abnormal MRI signals and those without abnormal MRI signals (E). In the muscle regions examined by MRI, SUVmax in the corresponding muscles are higher in vFDG-positive muscles than in vFDG-negative muscles (F).

**Figure 3.** FDG PET (A) and MRI findings (B) of thighs in a patient with PM (Patient 14). In MRI, muscles show a diffuse high signal. In contrast, FDG uptake is more localized and predominantly inside of the muscles.

1  
2  
3  
4  
5  
6 **Figure 4.** The mean values of SUVmax in four extremities are higher in the patients with PM/DM  
7  
8 than in those with ALS (A). In the patients with PM/DM, SUVmax in bilateral same muscles is  
9  
10 highly correlated, suggesting symmetrical muscle inflammation (B). Correlation coefficient is as  
11  
12 follows: bilateral quadriceps femoris,  $\rho = 0.91$ ,  $p < 0.0001$ ; bilateral medial and posterior  
13  
14 components of thigh,  $\rho = 0.88$ ,  $p < 0.0001$ ; right quadriceps femoris and right medial and posterior  
15  
16 components of thigh,  $\rho = 0.58$ ,  $p = 0.0004$ ; left quadriceps and left medial and posterior  
17  
18 components of thigh,  $\rho = 0.69$ ,  $p < 0.0001$ . In patients with ALS, only a moderate correlation is  
19  
20 found between bilateral same muscles (Spearman rank correlation) (C).  
21  
22  
23  
24  
25  
26  
27  
28  
29  
30  
31  
32  
33  
34  
35  
36  
37  
38  
39  
40  
41  
42  
43  
44  
45  
46  
47  
48  
49  
50  
51  
52  
53  
54  
55  
56  
57  
58  
59  
60

Table 1 Summary of patients with PM/DM

| Clinical findings                     |     |                    |        |      |      |                 | Visually identified FDG uptakes in muscles§ |    |   |   |    |    |   |   | FDG uptakes in other organs |              |                 |        | Muscle biopsy findings¶ |          |         | MRI findings** |              |                      |
|---------------------------------------|-----|--------------------|--------|------|------|-----------------|---------------------------------------------|----|---|---|----|----|---|---|-----------------------------|--------------|-----------------|--------|-------------------------|----------|---------|----------------|--------------|----------------------|
| Age                                   | Sex | Clinical diagnosis |        | Dur* | CK†  | Therapy at PET‡ | SCM                                         | PC | S | U | PT | PL | B | T | Lung                        | Lymph nodes. | Malignancy.     | others | Sites                   | Cell inf | Nec/reg | Sites          | High signals | Consistency with PET |
| PM/DM without other collagen diseases |     |                    |        |      |      |                 |                                             |    |   |   |    |    |   |   |                             |              |                 |        |                         |          |         |                |              |                      |
| 1                                     | 24  | M                  | DM     | 1    | 3000 | 5d P80          |                                             |    |   |   |    |    |   |   | ↑                           |              |                 |        | BB                      | 2        | 3       | thigh          | (+)          | P (+)                |
| 2                                     | 82  | M                  | DM     | 1    | 4307 | 5d P50          |                                             |    |   |   |    |    |   |   |                             |              | porta hepatis   |        | BB                      | 0        | 1       | thigh          | (+)          | (-)                  |
| 3                                     | 52  | F                  | DM     | 4    | 436  | (-)             |                                             |    |   |   |    |    |   |   |                             |              |                 |        | BB                      | 3        | 3       | thigh          | (+)          | P (+)                |
| 4                                     | 20  | F                  | DM     | 3    | 312  | (-)             |                                             |    |   |   |    |    |   |   | ↑                           |              |                 |        | BB                      | 0        | 1       | thigh          | (+)          | (-)                  |
| 5                                     | 37  | F                  | DM ILD | 1    | 783  | 7d P20          |                                             |    |   |   |    |    |   |   | ↑                           |              |                 |        | BB                      | 1        | 1       | thigh          | (+)          | (-)                  |
| 6                                     | 33  | F                  | DM     | 3    | 51   | (-)             |                                             |    |   |   |    |    |   |   | ↑                           |              | stomach, uterus |        | BB                      | 1        | 1       | Not done       |              |                      |
| 7                                     | 33  | F                  | DM     | 2    | 274  | (-)             |                                             |    |   |   |    |    |   |   | ↑                           |              | marrow, spleen  |        | BB                      | 0        | 0       | Not done       |              |                      |
| 8                                     | 73  | F                  | DM     | 1    | 182  | (-)             |                                             |    |   |   |    |    |   |   | ↑                           |              | stomach         |        | BB                      | 3        | 3       | Not done       |              |                      |
| 9                                     | 66  | M                  | DM     | 4    | 239  | (-)             |                                             |    |   |   |    |    |   |   |                             |              |                 |        | BB                      | 0        | 2       | should.br      | (+)          | P (+)                |
| 10                                    | 65  | M                  | DM     | 2    | 377  | (-)             |                                             |    |   |   |    |    |   |   | ↑                           |              | lung            |        | Deltoid                 | 1        | 2       | brachium       | (+)          | (-)                  |
| 11                                    | 53  | M                  | DM     | 4    | 2488 | (-)             |                                             |    |   |   |    |    |   |   |                             |              |                 |        | BB                      | 2        | 2       | thigh          | (+)          | P (+)                |
| 12                                    | 25  | F                  | PM     | 4    | 926  | (-)             |                                             |    |   |   |    |    |   |   |                             |              |                 |        | BB                      | 2        | 0       | thigh          | (+)          | P (+)                |
| 13                                    | 76  | F                  | PM ILD | 2    | 1343 | (-)             |                                             |    |   |   |    |    |   |   | ↑                           |              |                 |        | BB                      | 1        | 3       | thigh          | (+)          | P (+)                |
| 14                                    | 54  | M                  | PM ILD | 14   | 6347 | 2d P60          |                                             |    |   |   |    |    |   |   | ↑                           |              |                 |        | Gastro                  | 1        | 1       | thigh          | (+)          | P (+)                |
| 15                                    | 56  | F                  | PM ILD | 8    | 362  | (-)             |                                             |    |   |   |    |    |   |   | ↑                           | ↑            | joints          |        | QF                      | 2        | 1       | thigh          | (+)          | (-)                  |
| 16                                    | 55  | F                  | PM     | 12   | 1019 | (-)             |                                             |    |   |   |    |    |   |   | ↑                           | ↑            | spleen          |        | BB                      | 1        | 1       | Not done       |              |                      |
| 17                                    | 69  | F                  | PM     | 60   | 758  | (-)             |                                             |    |   |   |    |    |   |   |                             |              | myocardium      |        | Deltoid                 | 1        | 2       | Not done       |              |                      |
| 18                                    | 79  | F                  | PM     | 7    | 9627 | (-)             |                                             |    |   |   |    |    |   |   |                             |              | lung            |        | BB                      | 0        | 2       | thigh          | (+)          | (-)                  |
| 19                                    | 52  | M                  | PM     | 60   | 3372 | 9d P60          |                                             |    |   |   |    |    |   |   |                             |              |                 |        | Deltoid                 | 2        | 1       | thigh          | (+)          | (-)                  |
| 20                                    | 40  | F                  | PM     | 2    | 1842 | 7d P60          |                                             |    |   |   |    |    |   |   |                             |              |                 |        | BB                      | 1        | 2       | Not done       |              |                      |

Tateyama et al.22

|                                    |    |   |           |    |      |         |  |  |  |  |  |  |  |  |  |  |           |                |    |          |          |          |     |       |
|------------------------------------|----|---|-----------|----|------|---------|--|--|--|--|--|--|--|--|--|--|-----------|----------------|----|----------|----------|----------|-----|-------|
| 21                                 | 50 | F | PM        | 36 | 7182 | (-)     |  |  |  |  |  |  |  |  |  |  | BB        | 0              | 2  | brachium | (-)      | (-)      |     |       |
| 22                                 | 73 | M | PM ILD    | 1  | 1377 | 13d P55 |  |  |  |  |  |  |  |  |  |  | diaphragm | BB             | 2  | 1        | Not done |          |     |       |
| PM/DM with other collagen diseases |    |   |           |    |      |         |  |  |  |  |  |  |  |  |  |  |           |                |    |          |          |          |     |       |
| 23                                 | 27 | F | MCTD      | 7  | 200  | 8d P50  |  |  |  |  |  |  |  |  |  |  | ↑         | salivary gland | BB | 2        | 1        | thigh    | (-) | (-)   |
| 24                                 | 72 | F | PM, SSC   | 18 | 1442 | (-)     |  |  |  |  |  |  |  |  |  |  | ↑ ↑       | pudenda        | BB | 2        | 1        | brachium | (+) | P (+) |
| 25                                 | 73 | F | PM, SSC   | 14 | 126  | (-)     |  |  |  |  |  |  |  |  |  |  | ↑         | thyroid gland. | BB | 0        | 0        | thigh    | (-) | N (+) |
| 26                                 | 70 | F | PM RA Sjs | 24 | 761  | (-)     |  |  |  |  |  |  |  |  |  |  | ↑ ↑       |                | BB | 2        | 2        | thigh    | (+) | (-)   |
| 27                                 | 72 | F | PM CREST  | 36 | 386  | (-)     |  |  |  |  |  |  |  |  |  |  | ↑         | joints         | QF | 2        | 1        | thigh    | (+) | P (+) |
| 28                                 | 42 | M | MCTD      | 3  | 5585 | (-)     |  |  |  |  |  |  |  |  |  |  | ↑         |                | BB | 3        | 3        | thigh    | (+) | P (+) |
| 29                                 | 65 | F | PM Sjs    | 2  | 1764 | (-)     |  |  |  |  |  |  |  |  |  |  | ↑ ↑       | joints         | BB | 2        | 2        | thigh    | (-) | (-)   |
| 30                                 | 70 | F | PM RA     | 3  | 1050 | (-)     |  |  |  |  |  |  |  |  |  |  | ↑ ↑       |                | QF | 2        | 1        | Not done |     |       |
| 31                                 | 63 | M | PM SSC    | 7  | 1396 | (-)     |  |  |  |  |  |  |  |  |  |  |           |                | BB | 1        | 2        | brachium | (-) | N (+) |
| 32                                 | 52 | F | PM SSC    | 1  | 1142 | (-)     |  |  |  |  |  |  |  |  |  |  | ↑ ↑       |                | BB | 0        | 1        | brachium | (+) | (-)   |
| 33                                 | 75 | F | MCTD      | 7  | 2123 | (-)     |  |  |  |  |  |  |  |  |  |  |           | peritoneum     | BB | 2        | 2        | brachium | (+) | P (+) |

\*Duration of the illness (months).

†Serum creatine kinase level (IU/L).

‡Duration (days, d) and daily dose (mg) of prednisolone (P) at the time of PET study.

§The regions of positive vFDG at least in either side of the region are filled. We describe the positivity criterion of vFDG in Material and Methods.

¶We describe our criteria for grading of pathological findings in Material and Methods.

\*\*P (+), both PET and MRI showed positive findings; N (+), both PET and MRI were negative; (-), either PET or MRI showed positive findings and the other was negative.

B, buttock; BB, biceps brachii; cell inf, mononuclear cell infiltration; CREST, CREST syndrome; DM, dermatomyositis; Gastro, gastrocnemius; ILD, interstitial lung disease; MCTD, mixed connective tissue disease; nec/reg, muscle fiber necrosis and regeneration; PC, paraspinal muscles at cervical levels; PL, paraspinal muscles at lumbar levels; PM, polymyositis; PT, paraspinal muscles at thoracic levels; QF, quadriceps femoris; RA, rheumatoid arthritis; S, shoulders; SCM, sternocleidomastoid muscles; Sjs, Sjögren syndrome; SSC, systemic sclerosis; T, thighs.

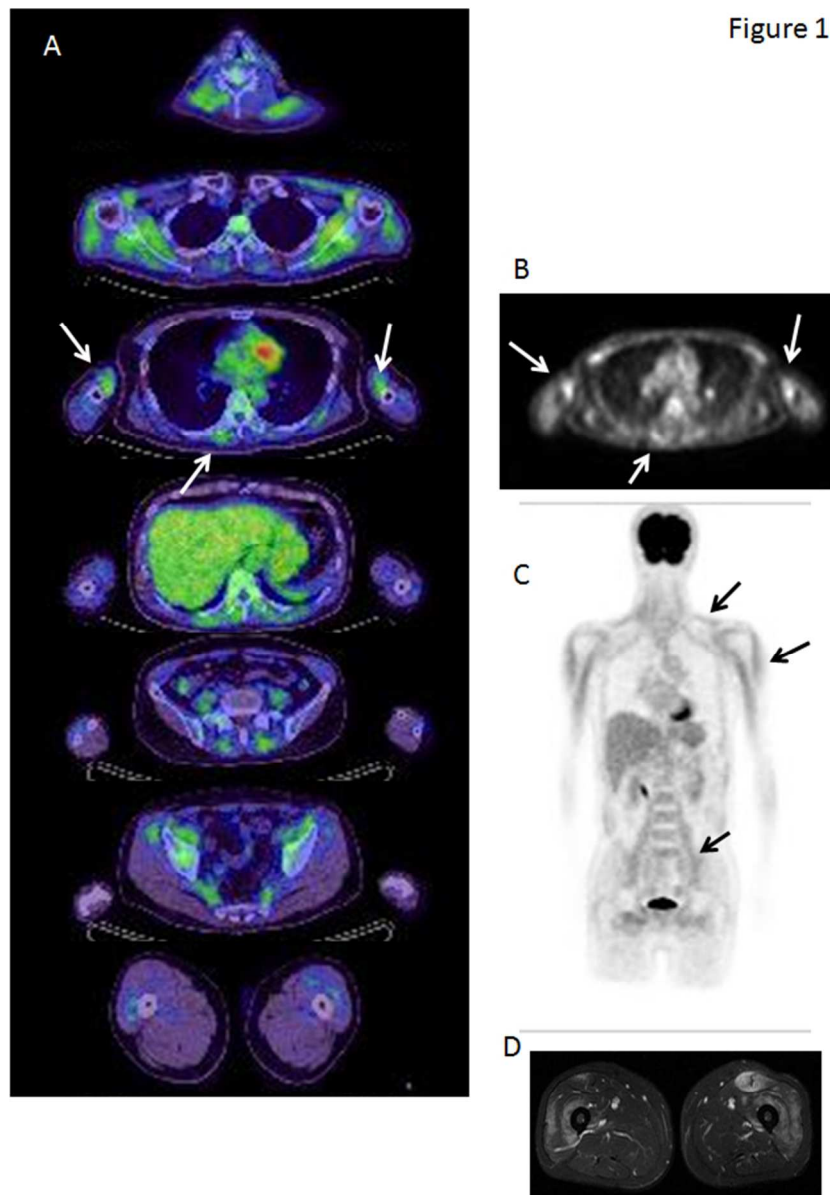

Figure 1. FDG PET and MRI findings in a patient with dermatomyositis (Patient 11). Serial sections of FDG PET/CT (A). Using FDG uptake in mediastinum vessels as a positivity standard, positive regions were found in the body, including paraspinal muscles, shoulders, upper arms, and lumbar girdles, in a predominantly symmetric distribution. An FDG PET image of the upper arm level (B). Frontal view of an FDG PET image indicating FDG uptake in shoulders, upper arms, and iliopsoas (C). MRI of the thighs (D) showing high signal areas in bilateral quadriceps femoris (T2-weighted images with fat suppression).  
57x76mm (300 x 300 DPI)



Figure 2

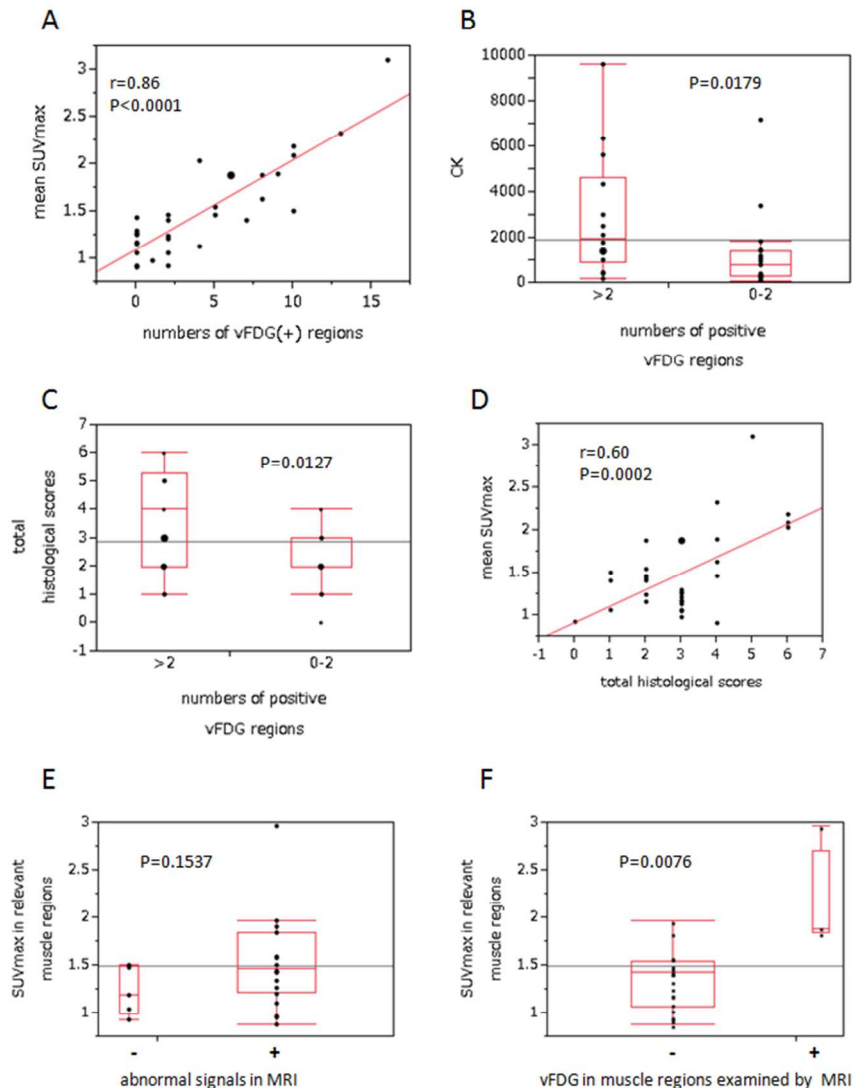

Figure 2. Numbers of vFDG-positive muscle regions are correlated with the mean value of SUVmax in four extremities (A). Serum values of creatinine kinase (CK) are higher in patients with more than two vFDG-positive muscle regions than in those with two or less vFDG positive muscle regions (B). Total histological scores are higher in patients with more than two vFDG-positive muscle regions than in those with two or less vFDG-positive muscle regions (C). Mean values of SUVmax in four extremities are correlated with total histological scores (D). There are no difference in SUVmax in corresponding muscles between the muscles with abnormal MRI signals and those without abnormal MRI signals (E). In the muscle regions examined by MRI, SUVmax in the corresponding muscles are higher in vFDG-positive muscles than in vFDG-negative muscles (F).

57x76mm (300 x 300 DPI)

Figure 3

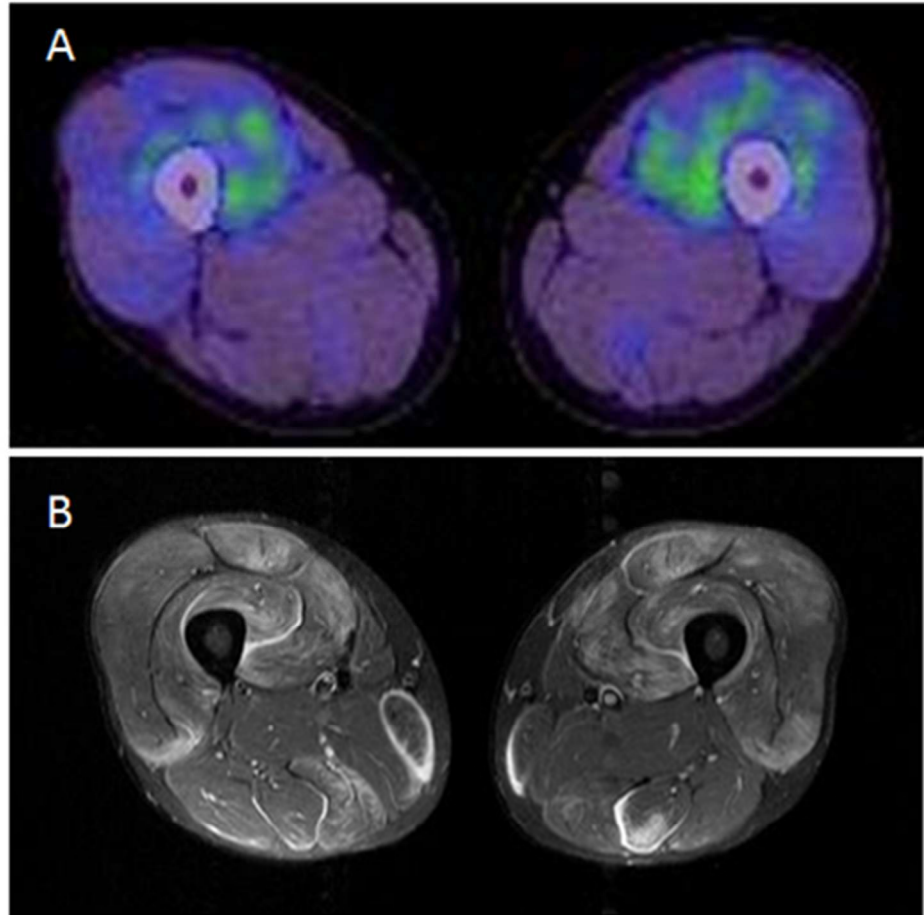

Figure 3. FDG PET (A) and MRI findings (B) of thighs in a patient with PM (Patient 14). In MRI, muscles show a diffuse high signal. In contrast, FDG uptake is more localized and predominantly inside of the muscles.

42x46mm (300 x 300 DPI)

Figure 4

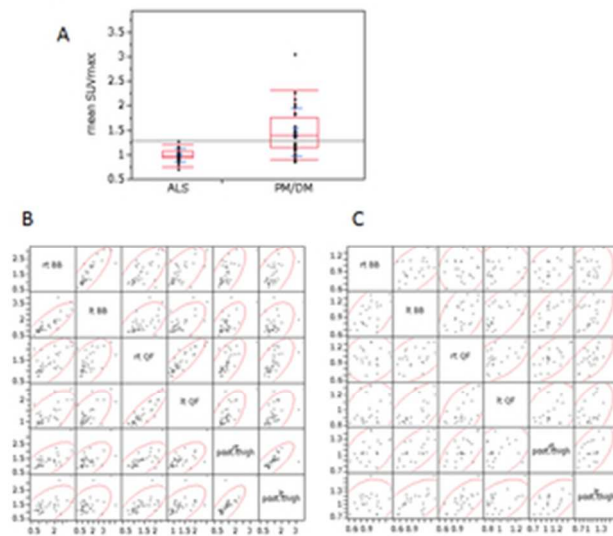

Figure 4. The mean values of SUVmax in four extremities are higher in the patients with PM/DM than in those with ALS (A). In the patients with PM/DM, SUVmax in bilateral same muscles is highly correlated, suggesting symmetrical muscle inflammation (B). Correlation coefficient is as follows: bilateral quadriceps femoris,  $\rho = 0.91$ ,  $p < 0.0001$ ; bilateral medial and posterior components of thigh,  $\rho = 0.88$ ,  $p < 0.0001$ ; right quadriceps femoris and right medial and posterior components of thigh,  $\rho = 0.58$ ,  $p = 0.0004$ ; left quadriceps and left medial and posterior components of thigh,  $\rho = 0.69$ ,  $p < 0.0001$ . In patients with ALS, only a moderate correlation is found between bilateral same muscles (Spearman rank correlation) (C).

13x12mm (600 x 600 DPI)

# BMJ Open

## Clinical values of FDG PET in polymyositis and dermatomyositis syndromes: imaging of skeletal muscle inflammation

|                                 |                                                                                                                                                                                                                                                                                                                                                                                                                                                                                                                                                                                                                                                                                   |
|---------------------------------|-----------------------------------------------------------------------------------------------------------------------------------------------------------------------------------------------------------------------------------------------------------------------------------------------------------------------------------------------------------------------------------------------------------------------------------------------------------------------------------------------------------------------------------------------------------------------------------------------------------------------------------------------------------------------------------|
| Journal:                        | <i>BMJ Open</i>                                                                                                                                                                                                                                                                                                                                                                                                                                                                                                                                                                                                                                                                   |
| Manuscript ID:                  | bmjopen-2014-006763.R1                                                                                                                                                                                                                                                                                                                                                                                                                                                                                                                                                                                                                                                            |
| Article Type:                   | Research                                                                                                                                                                                                                                                                                                                                                                                                                                                                                                                                                                                                                                                                          |
| Date Submitted by the Author:   | 28-Oct-2014                                                                                                                                                                                                                                                                                                                                                                                                                                                                                                                                                                                                                                                                       |
| Complete List of Authors:       | Tateyama, Maki; Tohoku University School of Medicine, Department of Neurology<br>Fujihara, Kazuo; Tohoku University School of Medicine, Department of Neurology; Tohoku University Graduate School of Medicine, Multiple Sclerosis Therapeutics<br>Misu, Tatsuro; Tohoku University Graduate School of Medicine, Multiple Sclerosis Therapeutics; Tohoku University Graduate School of Medicine, Neurology<br>Arai, Akira; Tohoku University School of Medicine, Department of Diagnostic Radiology<br>Kaneta, Tomohiro; Tohoku University School of Medicine, Department of Diagnostic Radiology<br>Aoki, Masashi; Tohoku University School of Medicine, Department of Neurology |
| <b>Primary Subject Heading</b>: | Neurology                                                                                                                                                                                                                                                                                                                                                                                                                                                                                                                                                                                                                                                                         |
| Secondary Subject Heading:      | Radiology and imaging, Rheumatology                                                                                                                                                                                                                                                                                                                                                                                                                                                                                                                                                                                                                                               |
| Keywords:                       | Neuroradiology < RADIOLOGY & IMAGING, IMMUNOLOGY, HISTOPATHOLOGY, Neurology < INTERNAL MEDICINE, Rheumatology < INTERNAL MEDICINE                                                                                                                                                                                                                                                                                                                                                                                                                                                                                                                                                 |

SCHOLARONE™  
Manuscripts

1  
2  
3  
4  
5  
6 Clinical values of FDG PET in polymyositis and dermatomyositis syndromes: imaging of skeletal  
7  
8 muscle inflammation  
9  
10

11  
12  
13  
14 Maki Tateyama<sup>1,2</sup>, Kazuo Fujihara<sup>1</sup>, Tatsuro Misu<sup>1</sup>, Akira Arai<sup>3</sup>, Tomohiro Kaneta<sup>3</sup>, Masashi Aoki<sup>1</sup>  
15  
16

17  
18  
19 <sup>1</sup>Department of Neurology, Tohoku University School of Medicine  
20

21 <sup>2</sup>Department of Neurology, Iwate National Hospital  
22

23 <sup>3</sup>Department of Diagnostic Radiology, Tohoku University School of Medicine  
24  
25  
26  
27  
28  
29

30 Corresponding author  
31

32 Maki Tateyama  
33

34 Department of Neurology, Iwate National Hospital  
35

36 48 Yamanome, Ichinoseki, 021-0056, Iwate, Japan,  
37

38 Tel: +81-191-25-2221  
39

40 e-mail: mtateyama@iwate-h.com  
41  
42  
43  
44  
45  
46

47 Keywords: inflammatory myopathies, polymyositis, dermatomyositis, FDG PET, FDG PET/CT,  
48

49 MRI  
50  
51  
52

53 Word count: text, 3704 words; abstract, 283 words; 1 table, 4 figures, 25 references  
54  
55  
56  
57  
58  
59  
60

**ABSTRACT**

**Objectives:** [<sup>18</sup>F] fluorodeoxyglucose positron emission tomography (FDG PET), a standard tool for evaluating malignancies, can also detect inflammatory lesions. However, its usefulness in evaluating muscle lesions in polymyositis and dermatomyositis syndromes (PM/DM) has not been established.

**Methods:** Thirty-three patients with PM/DM who had undergone FDG PET were retrospectively analyzed. FDG uptake was visually evaluated (visually identified FDG uptake, vFDG) in 16 regions of the body using mediastinum blood vessels as a positivity criterion. We also calculated the maximum standardized uptake value (SUVmax) in all four limbs of the patients with PM/DM as well as in 22 patients with amyotrophic lateral sclerosis (ALS) with similar disabilities. In 24 patients with PM/DM, MRI and FDG PET findings were compared.

**Results:** vFDG was observed in multiple muscle lesions with varying distributions in two-thirds of the PM/DM patients, with most lesions being symmetrical. The number of vFDG-positive regions strongly correlated with the mean SUVmax in all four limbs ( $p < 0.0001$ ). Histological grades of biopsied muscles correlated with both the mean SUVmax and number of vFDG-positive regions. Serum creatine kinase levels were higher in patients with more than two vFDG-positive regions than in those with two or less regions ( $p < 0.05$ ). While the inflamed muscles showed diffuse, patchy, or marginal signal abnormalities on MRI, FDG uptake was most prominent inside the muscles. Compared with ALS, the mean SUVmax was significantly higher in the PM/DM patients ( $p < 0.0001$ ) and showed a striking correlation in the bilateral muscles reflecting symmetrical muscle involvement in PM/DM.

**Conclusions:** The visual assessment of FDG uptake as well as calculation of SUV enabled us to comprehensively evaluate skeletal muscle. This method can improve clinical practices and provide insights into pathomechanisms of PM/DM.

**Strengths and limitations of this study**

This is the first study that comprehensively investigated the usefulness of FDG PET in evaluating muscle lesions in patients with polymyositis dermatomyositis syndromes using visual evaluation and SUV measurement. The study demonstrated the usefulness of these two methods. Visual evaluation of FDG uptake can be used in clinical practice.

The limitation of the study is that it is retrospective. Patients underwent FDG PET for the detection of occult cancer, therefore, the imaging range was from the head to the middle of the thighs. Eight patients underwent FDG PET and 25 patients underwent FDG PET/CT. Data regarding manual muscle test was not obtained. Polymyositis dermatomyositis syndromes and non-inflammatory myopathies were not compared.

## INTRODUCTION

Idiopathic inflammatory myopathies are a heterogeneous group of disorders clinically characterized by progressive proximal muscle weakness and pathologically by mononuclear cell infiltration and fiber necrosis in muscles. Polymyositis (PM), dermatomyositis (DM), and inclusion body myositis are representative phenotypes.<sup>1</sup> Both PM and DM are thought to be immune-mediated disorders that can be successfully treated if properly managed. In contrast, in inclusion body myositis, degenerative processes also play an equal or greater role and effective treatments remain to be elucidated.<sup>2</sup> Patients with PM and DM syndromes (PM/DM) may present with other organ involvement, such as interstitial lung disease.<sup>3,4</sup> They may also evolve with other collagen diseases and malignancies.<sup>4,5</sup> In addition, the extent and pattern of muscle involvement are variable. PM/DM can present with prominent truncal muscle weakness or preferential involvement of respiratory muscles.<sup>6,7</sup> Thus, it is essential to systemically diagnose and evaluate patients with PM/DM.

[<sup>18</sup>F] fluorodeoxyglucose positron emission tomography (FDG PET) is a standard tool for detecting malignancies. FDG also accumulates in inflammatory lesions where glucose-consuming inflammatory cells infiltrate.<sup>8</sup> FDG PET is useful for diagnosing systemic inflammatory diseases, including collagen vascular disorders such as rheumatoid arthritis, vasculitis, and polymyalgia rheumatica.<sup>9-11</sup> In PM/DM, only a limited number of studies have demonstrated FDG PET detection of inflammatory muscle lesions. Owada et al. visually assessed FDG uptake (FDG uptake greater than or equal to that of the liver) in proximal muscles using FDG PET in 24 patients with PM/DM. They found that increased FDG uptake was more frequent in patients with PM/DM than in controls (33% versus 2%).<sup>12</sup> Pipitone et al. measured the maximum standardized uptake value (SUVmax) in the proximal muscles of all four limbs and calculated the muscle/liver SUVmax ratio in 12 patients with PM/DM using FDG PET/computed tomography (CT). They showed that the proximal muscle



1  
2  
3  
4  
5 SUV ratio was higher in patients with PM/DM than in controls.<sup>13</sup> In these two studies, increased  
6  
7  
8 FDG uptake in proximal muscles did not correlate with clinical parameters or MRI findings. In  
9  
10 contrast, Tanaka et al. measured the mean SUV using FDG PET/CT in 14 proximal muscle groups  
11  
12 of 20 patients with PM/DM and demonstrated that an increased SUV in proximal muscles of  
13  
14 myositis patients as well as the mean proximal muscle SUV was correlated with serum creatine  
15  
16 kinase (CK) and muscle strength.<sup>14</sup> They also found that local SUV correlated with the degree of  
17  
18 inflammation in muscle biopsies and weakness of the corresponding muscles. However, their  
19  
20 method using global SUV calculations may not be feasible in daily clinical practice. For successful  
21  
22 clinical application of FDG PET, a simple and reliable way to assess PM/DM muscles is preferable.  
23  
24

25  
26 In this study, we visually evaluated FDG PET findings in patients with PM/DM in detail and  
27  
28 determined the extent and pattern of inflammation. We compared visually evaluated FDG PET  
29  
30 findings with SUVmax in proximal muscles as well as with clinical and pathological findings. We  
31  
32 also compared MRI findings with FDG uptake in the same muscle regions. Furthermore, we  
33  
34 compared SUVmax in proximal muscles between patients with PM/DM and those with ALS.  
35  
36

## 37 38 **MATERIALS AND METHODS**

### 39 40 **Patients**

41  
42 Thirty-three patients with recent-onset PM/DM were enrolled in this study. Patients underwent  
43  
44 FDG PET or FDG PET/CT to investigate malignancies before or shortly after receiving an initial  
45  
46 corticosteroid treatment from January 2009 to July 2013. They were identified by a retrospective  
47  
48 review of medical records in our department. Clinically, patients showed symmetrical proximal  
49  
50 muscle weakness, elevated serum muscle enzymes, and myositis-compatible electrophysiological  
51  
52 findings proposed by Bohan and Peter.<sup>15</sup> Muscle biopsies were conducted in all patients and  
53  
54 showed inflammatory infiltrates, muscle fiber necrosis, and/or expression of HLA class 1 on  
55  
56  
57  
58  
59  
60

1  
2  
3  
4  
5  
6 muscle fibers. A few patients showed either inflammatory infiltrates or muscle fiber necrosis. In  
7  
8 these patients, other muscle diseases were carefully excluded. Subsequent therapy with  
9  
10 corticosteroids alone or additional immunomodulatory therapies were effective in all but one  
11  
12 patient who died before treatment initiation. Clinical records, laboratory data, and muscle MRIs  
13  
14 from each patient were collected. Patients with inclusion body myositis were not included. We  
15  
16 identified 22 patients with amyotrophic lateral sclerosis (ALS) who were admitted to our hospital  
17  
18 for diagnosis and had undergone FDG PET/CT for the detection of occult cancer. These patients  
19  
20 were included in this study as disease controls. Eighteen patients fulfilled the diagnostic criteria for  
21  
22 clinically definite, clinically probable, or clinically probable-laboratory supported ALS according to  
23  
24 the revised El Escorial criteria of the World Federation of Neurology.<sup>16</sup> Four patients showed only  
25  
26 lower motor neuron symptoms with exclusion of other diseases. Degrees of disability in patients  
27  
28 with PM/DM and those with ALS were similar; all of these patients were able to walk and  
29  
30 performed activities of daily life independently, but with some difficulties. The study was approved  
31  
32 by the Tohoku University School of Medicine ethics committee.  
33  
34  
35  
36  
37

### 38 **FDG PET imaging**

39  
40 Patients fasted for a minimum of 4 h before the <sup>18</sup>F-FDG injection. Blood glucose levels were  
41  
42 measured, and patients with blood levels > 150 mg/dl were not included. After injection of  
43  
44 approximately 185 MBq (3.1 MBq/kg) of <sup>18</sup>F-FDG, the patients rested on the bed for 1 hour. PET  
45  
46 scan was then performed from the head to the mid-thigh using a PET scanner (ECAT EXACT HR+,  
47  
48 Siemens, Erlangen, Germany) or PET/CT scanner (Biograph Duo or 40, Siemens, Erlangen,  
49  
50 Germany). PET/CT scanners have been used since April 2009 and have replaced a dedicated PET  
51  
52 scanner in our institute. FDG uptake was visually evaluated (visually identified FDG uptake,  
53  
54 vFDG) in skeletal muscles using dedicated workstations by two radiologists (AA, TK). FDG uptake  
55  
56  
57  
58  
59  
60

1  
2  
3  
4  
5  
6 was independently assessed in a blinded manner. vFDG was evaluated in 16 regions, including the  
7  
8 upper arms: shoulders: sternocleidomastoid muscles: paraspinal muscles of cervical, thoracic, and  
9  
10 lumbar levels: buttocks: and upper part of the thighs in both sides (Figure 1). Regions with an FDG  
11  
12 uptake greater than or equal to that of the mediastinum blood vessels were considered  
13  
14 vFDG-positive.<sup>17</sup> Regions judged to be positive by both radiologists were defined as  
15  
16 vFDG-positive and the number of vFDG- positive regions were counted (minimum = 0 and  
17  
18 maximum = 16 in each patient). In addition, SUV was calculated in patients with PM/DM and in 22  
19  
20 patients with ALS in the biceps brachii, quadriceps femoris, and medial and posterior  
21  
22 compartments of the thigh (hamstrings, abductor magnus, gracilis) on both sides. In one PM patient,  
23  
24 we were not able to calculate SUV in the biceps brachii, because the sectional area of the muscle  
25  
26 was of insufficient size to place the region of interest (ROI). The ROI (20mm) was placed in the  
27  
28 highest FDG uptake area in each muscle region. SUV was calculated as both the maximum value  
29  
30 (SUVmax) and mean value (SUVmean) in ROIs. The mean proximal muscles SUVmax (mean  
31  
32 SUVmax) and SUVmean (mean SUVmean) were calculated by averaging the values obtained for  
33  
34 the six muscle regions.  
35  
36  
37  
38  
39

#### 40 **Muscle MRI**

41  
42 Muscle MRI was performed during a routine examination using the 1.5T Intera scanner  
43  
44 (Philips, Best, the Netherlands) before treatment. Results were assessed by experienced radiologists.  
45  
46 Abnormal signals in skeletal muscles were identified on T2-weighted images with fat suppression  
47  
48 (T2W/FS) or short tau inversion recovery (STIR) sequence with long TE. In the patients who also  
49  
50 underwent gadolinium contrast-enhancement, abnormal enhancement in the muscle and/or muscle  
51  
52 fascia was evaluated.  
53  
54  
55  
56  
57  
58  
59  
60

## Muscle biopsy

Muscle biopsies were obtained before treatment in all patients with PM/DM. The muscle was taken from the biceps brachii (26 patients), deltoid (three patients), quadriceps femoris (three patients), and gastrocnemius (one patient). Biopsied muscles were snap frozen and a routine histochemical study was conducted. The most affected lesions in each specimen were photographed with objective lens of 10-fold magnifications. Histological findings were assessed in a blinded manner by an experienced neurologist well versed in neuropathology (TM). The extent of mononuclear cell infiltration (mononuclear cell infiltration score) was graded as follows: 0, none or slight; 1, one focus of mononuclear cell infiltration; 2, more than one focus of mononuclear cell infiltration; and 3, diffuse mononuclear cell infiltration. Muscle fiber necrosis and regeneration (necrosis/regeneration score) were graded as follows: 0, none; 1, 1% or less of muscle fibers showing necrosis or regeneration; 2, more than 1% and no more than 10% of muscle fibers showing necrosis or regeneration; and 3, more than 10% of muscle fibers showing necrosis or regeneration. The total histological scores were calculated for each patient by adding the mononuclear cell infiltration and the necrosis/regeneration scores.

## Statistical analysis

Statistical analysis was performed using JNP8 software (SAS Institute Inc., Cary, NC, USA). Statistical significance was analyzed by the Wilcoxon rank sum test (nonparametric), simple regression analysis, and Spearman rank correlation. Comparisons were considered to be statistically significant if  $p < 0.05$ .

## RESULTS

### Patient characteristics

1  
2  
3  
4  
5  
6 The characteristics of the 33 patients with PM/DM (10 males, 23 females; mean age  $56 \pm$   
7  
8 17.9 years) who underwent FDG PET (eight patients) or FDG PET/CT (25 patients) are  
9  
10 summarized in Table1. FDG PET was performed before any treatment in 25 patients. In eight  
11  
12 patients, FDG PET was performed shortly after beginning corticosteroid treatment (2 - 9 days:  
13  
14 mean 6.1 days). We provisionally divided PM/DM patients according to the presence or absence of  
15  
16 other collagen diseases. The number of patients in each clinical group and those of relevant  
17  
18 clinicopathological classifications proposed in the 119th European Neuromuscular Centre  
19  
20 international workshop<sup>18</sup> in each clinical group (parenthesis) were as follows: 11 DM patients  
21  
22 without other collagen diseases (four patients with definite DM, seven with probable DM), 11 PM  
23  
24 patients without other collagen diseases (nine patients with nonspecific myositis, one with definite  
25  
26 PM, and one with probable PM), and 11 PM/DM patients with other collagen diseases (eight  
27  
28 patients with nonspecific myositis, two with probable PM, and one with definite PM). Two patients  
29  
30 with DM and one with PM without other collagen diseases were shown to have malignancies.  
31  
32 Abnormal FDG uptake was noted in the lung in several patients, and most were diagnosed as  
33  
34 having interstitial lung diseases. FDG uptake in the lymph nodes was observed in 50% of patients  
35  
36 with DM, 18.2% of patients with PM without other collagen diseases, and 75% of patients with  
37  
38 PM/DM with other collagen diseases.  
39  
40  
41  
42  
43  
44

#### 45 **Visual assessment of FDG uptake in skeletal muscles of patients with PM/DM**

46  
47 vFDG in skeletal muscles was observed in 20/33 patients with PM/DM (60.6%). vFDG was  
48  
49 detected in multiple regions in 14 patients (42.4%) with various patterns (Table1) and almost  
50  
51 symmetrical distribution. The shoulders and buttocks were the most frequent vFDG-positive  
52  
53 regions. A fraction of patients with DM showed vFDG-positivity in most of the regions: a  
54  
55 representative case is shown in Figure 1. The number of vFDG-positive regions correlated with the  
56  
57  
58  
59  
60

1  
2  
3  
4  
5  
6 mean SUVmax of all four extremities ( $r = 0.87$ ,  $p < 0.0001$ ; Fig. 2A), implying that SUVmax in  
7  
8 extremities could be inferred by the extent of vFDG-positive regions. There was no correlation  
9  
10 between serum CK levels and the number of vFDG-positive regions ( $p = 0.20$ ). However, serum  
11  
12 CK levels were higher in patients with more than two vFDG-positive regions than in those with two  
13  
14 or less vFDG-positive regions ( $p = 0.0179$ ; Fig. 2B). The number of vFDG-positive regions also  
15  
16 correlated with the total histological score ( $r = 0.49$ ,  $p = 0.0038$ ; Fig. 2C). The number of  
17  
18 vFDG-positive regions correlated with necrosis/regeneration scores ( $r = 0.49$ ,  $p = 0.0036$ ), but not  
19  
20 with mononuclear cell infiltration scores ( $p = 0.06$ ).  
21  
22  
23  
24

#### 25 **Relationship between SUV and clinicopathological findings in patients with PM/DM**

26  
27 The mean SUVmax did not correlate with the duration of the illness. The mean SUVmax was  
28  
29 higher in males than females, although not significant ( $p = 0.075$ ). There were no significant  
30  
31 differences among patients with DM without other collagen diseases, PM without other collagen  
32  
33 diseases, and PM/DM with other collagen diseases. The total histological score correlated with the  
34  
35 mean SUVmax ( $r = 0.60$ ,  $p = 0.0002$ ; Fig. 2D). The mean SUVmax correlated more strongly with  
36  
37 necrosis/regeneration scores ( $r = 0.61$ ,  $p = 0.0002$ ) than with mononuclear cell infiltration scores ( $r$   
38  
39  $= 0.40$ ,  $p = 0.0198$ ). The total pathological score also correlated with SUVmax in the biopsied  
40  
41 muscles in the patients with PM/DM in whom biopsies were done in biceps brahii or quadriceps  
42  
43 femoris ( $r = 0.58$ ,  $p = 0.0017$ ). SUVmax in the biopsied muscles correlated more strongly with  
44  
45 necrosis/regeneration scores ( $r = 0.59$ ,  $p = 0.0013$ ) than mononuclear cell infiltration scores ( $r =$   
46  
47  $0.40$ ,  $p = 0.0361$ ). On the other hand, the mean SUVmax did not correlate with serum CK levels.  
48  
49 Serum CK levels did not correlated with total histological scores ( $p = 0.08$ ), necrosis/regeneration  
50  
51 scores ( $p = 0.22$ ), and mononuclear cell infiltration scores ( $p = 0.32$ ).  
52  
53  
54  
55  
56  
57  
58  
59  
60

### Comparison of FDG PET and MRI findings in PM/DM

Twenty-five patients with PM/DM underwent both FDG PET and muscle MRI. Muscle MRI was performed for the thighs (18 patients), upper arms (six patients), and shoulders (one patient). Twenty patients were judged to be MRI positive. In the MRI-positive regions of each patient, vFDG was positive in four patients. There were no patients that were MRI-negative and vFDG-positive. There was no difference in SUVmax of the muscles between MRI-positive and MRI-negative muscles ( $p = 0.1537$ ; Fig. 2E). In contrast, SUVmax of relevant muscles was significantly higher in vFDG-positive patients than in vFDG-negative patients ( $p = 0.0076$ ; Fig. 2F). These findings suggest that MRI is a sensitive tool for detecting inflammatory edema. However, high signals on MRI may not simply reflect the degree of inflammation.

Interestingly, the pattern of abnormal signals was different between FDG PET and MRI (Figs. 1 & 3). On MRI, affected muscles showed several patterns including diffuse or patchy high signals and high signals surrounding the muscles, which may reflect inflammatory edema (Figs 1 & 3). In contrast, FDG uptake was more localized in each muscle for most patients. The highest uptake was predominantly within muscles, a few centimeters from the muscle surface.

### SUVmax in the skeletal muscles of patients with PM/DM and ALS

The mean SUVmax was higher in patients with PM/DM than in those with ALS ( $1.463 \pm 0.483$  versus  $1.004 \pm 0.136$ ,  $p < 0.0001$ ; Fig. 4A). The mean SUVmean was also higher in patients with PM/DM ( $1.106 \pm 0.370$  versus  $0.733 \pm 0.139$ ,  $p < 0.0001$ ).

The SUVmax in the biceps brachii, quadriceps femoris, and medial and posterior compartments of the thigh in both sides was compared. In patients with PM/DM, SUVmax of one muscle region and that of another muscle region was correlated (biceps brachii versus medial and posterior compartments of the thigh, quadriceps versus biceps brachii, quadriceps versus medial

1  
2  
3  
4  
5  
6 and posterior compartments of the thigh). Moreover, there was a striking correlation between the  
7  
8 same muscles on both sides (biceps brachii, quadriceps femoris, medial and posterior compartments  
9  
10 of the thigh). The scatter plots suggested symmetrical muscle involvement in PM/DM (Fig. 4B).  
11  
12 Only moderate symmetry in SUVmax was found in patients with ALS (Fig. 4C).  
13

## 14 15 16 17 **DISCUSSION**

18  
19 In the present study, we assessed the skeletal muscles of patients with PM/DM using FDG  
20  
21 PET in two ways: visual assessment and SUV measurement. We found that the mean SUVmax in  
22  
23 four extremities of PM/DM patients was approximately 1.5, and the mean SUVmean was  
24  
25 approximately 1.1. These results are consistent with those of previous studies.<sup>13 14</sup> While a major  
26  
27 mechanism underlying FDG accumulation in inflamed tissue caused by rheumatoid arthritis is  
28  
29 uptake by metabolically active cells such as macrophages, young granulation tissue, and  
30  
31 fibroblasts,<sup>8 9</sup> there has been no report on PM/DM. In the present study, we found that SUVmax of  
32  
33 biopsied muscles correlated more strongly with necrosis/regeneration scores than with mononuclear  
34  
35 cell infiltration scores. These findings imply that macrophages assembled in necrotic muscle fiber  
36  
37 lesions and muscle fibers in regeneration stage may be a major background of FDG uptake in  
38  
39 PM/DM.  
40  
41

42  
43 Because FDG uptake in inflamed muscles is fairly moderate compared with that in the  
44  
45 neoplasm, setting an appropriate criterion for visual assessment is challenging. In a previous study  
46  
47 using liver in which an SUV of approximately 3 was the positivity criterion, 33% patients with  
48  
49 PM/DM had FDG-positive muscle regions.<sup>12</sup> In the present study, we chose the mediastinum blood  
50  
51 vessels, wherein SUV is approximately 2, as a positivity criterion for vFDG.<sup>17</sup> We found that  
52  
53 60.6% patients with PM/DM had vFDG-positive muscle regions. In addition, we divided the  
54  
55 proximal body muscle into 16 regions, which enabled us to evaluate the extent and patterns of  
56  
57  
58  
59  
60



1  
2  
3  
4  
5  
6 vFDG-positive regions. Most notably, the extent of vFDG-positive regions correlated with the  
7  
8 mean SUVmax and histological findings. There was only a mild correlation between the extent of  
9  
10 vFDG-positive regions and serum CK levels. Serum CK levels are a major clinical parameter in  
11  
12 PM/DM: however, it did not correlate with pathological severity in our patients. These findings  
13  
14 suggest that vFDG, using mediastinum blood vessels as the positivity criterion, is useful for the  
15  
16 assessment of systemic muscle lesions and that the extent of vFDG-positive regions can be an  
17  
18 indicator of the disease activity in PM/DM.  
19

20  
21 We also evaluated vFDG using another scoring system, in which 1 point was assigned when  
22  
23 the FDG uptake was greater than or equal to that of mediastinum blood vessels and 2 points  
24  
25 assigned when FDG uptake was greater than or equal to that of the liver. The points given by two  
26  
27 examiners were added in all the muscle regions in each patient (scores ranged from 0 to 64). These  
28  
29 scores also strongly correlated with the mean SUVmax ( $r = 0.90$ ,  $p < 0.0001$ ) and total histological  
30  
31 scores ( $p = 0.0014$ ).  
32

33  
34 MRI is now widely used to diagnose and determine biopsy sites in PM/DM.<sup>19,20</sup> It can  
35  
36 sensitively detect muscle edema in diseased muscle, including inflammatory myopathies.<sup>21</sup> Because  
37  
38 MRI detects inflammatory edema and FDG PET detects FDG uptake by metabolically active cells,  
39  
40 the images produced by the two modalities are different. In fact, MRI positivity did not correlate  
41  
42 with SUVmax in the same muscles in the present study. On MRI images, abnormal signals were  
43  
44 appeared as diffuse or patchy patterns in the muscles and sometimes surrounding the muscles. On  
45  
46 the other hand, FDG uptake tended to localize and was frequently found deep within each muscle.  
47  
48 Because FDG uptake theoretically reflects metabolically active sites, the pathology of the biopsied  
49  
50 muscles may not represent the most affected lesions. This may be the reason why we only found a  
51  
52 moderate correlation between the grade of pathological findings and SUVmax of corresponding  
53  
54 muscles. In the present study, abnormal MRI signals were positive in 20/25 patients, while vFDG  
55  
56  
57  
58  
59  
60

1  
2  
3  
4  
5  
6 was positive in four: therefore, the sensitivity of MRI seems to be superior. However, MRI was not  
7  
8 evaluated in a blinded manner in this study, and comparison was only performed for MRI  
9  
10 examination sites; other sites such as the paraspinal muscles and buttocks were not compared.  
11  
12 Further investigation is required to clarify the precise nature of abnormal signals using these two  
13  
14 measures.  
15

16  
17 Previous reports have shown that SUV in skeletal muscles is higher in patients with PM/DM  
18  
19 than in control patients without disability.<sup>13 14</sup> Comparisons of SUV between patients with PM/DM  
20  
21 and disabled control patients have never been reported. ALS is characterized by progressive muscle  
22  
23 weakness caused by degeneration of the upper and lower motor neurons. We found that the mean  
24  
25 SUVmax was significantly higher in patients with PM/DM patients than in those with ALS. These  
26  
27 findings suggest that FDG PET can distinguish between muscle weakness resulting from muscle  
28  
29 fiber destruction with inflammation and that resulting from neurogenic atrophy.  
30

31  
32 PM/DM is clinically characterized by symmetrical proximal muscle weakness.<sup>4</sup> In the  
33  
34 present study, we found a strong correlation between SUVmax of the same muscles on both sides  
35  
36 including bilateral quadriceps femoris, bilateral medial and posterior compartments of the thighs,  
37  
38 and bilateral biceps brachii. The correlation coefficient was higher for quadriceps femoris in both  
39  
40 sides and medial and posterior compartments of the thigh in both sides than in quadriceps femoris  
41  
42 and medial and posterior compartments of the same side of the legs. These findings statistically  
43  
44 verified that the inflammatory muscle damage progresses symmetrically in PM/DM, although  
45  
46 muscle lesions are often multifocal in each muscle. The current pathological mechanism of PM/DM  
47  
48 based on immunopathology cannot explain the symmetrical muscle damage in PM/DM.<sup>4 22</sup> Several  
49  
50 possible mechanisms may explain the symmetry, such as an involvement of anatomical factors,  
51  
52 including vasculatures and peripheral nerves, or some immune or physiological factors of  
53  
54 individual muscles that can influence the extent of inflammation.  
55  
56  
57  
58  
59  
60

1  
2  
3  
4  
5  
6 The present study has several limitations. The study was retrospective and FDG PET was  
7 performed to detect malignancies. The extent of the imaging range was therefore restricted from  
8 the head to the middle of the thighs, limiting evaluation of the thighs; however, a negligible  
9 number of false negatives in vFDG were most likely produced. Nevertheless, we propose that  
10 when FDG PET is conducted in PM/DM patients, scans should include, at least, the entire length  
11 of the thighs to produce more informative data. In this study, we could not study whether FDG  
12 uptake in skeletal muscles changed after immunomodulatory treatment, because only a few  
13 patients underwent FDG PET two times or more. A part of patients underwent FDG PET shortly  
14 after beginning corticosteroid. Manual muscle test (MMT) data were not obtained from all  
15 patients; therefore, we could not compare MMT and FDG PET findings. We were unable to  
16 compare FDG PET findings between PM/DM patients and noninflammatory myopathies, such as  
17 muscular dystrophy.  
18  
19  
20  
21  
22  
23  
24  
25  
26  
27  
28  
29  
30

31  
32 In conclusion, our findings indicated the utility and convenience of FDG PET in the clinical  
33 characterization of PM/DM. The greatest advantage of FDG PET is that it can screen the whole  
34 body in a single scan. Apart from malignancies,<sup>23</sup> this methods can also evaluate lung  
35 inflammation<sup>24</sup> and swelling of lymph nodes. We can visually evaluate the extent and pattern of  
36 muscle lesions systemically and include structures that are not routinely screened by MRI. In  
37 addition, the degree of pathology in muscle can be inferred from the extent of vFDG-psotivity. In  
38 addition, semiquantitative evaluation using SUV is useful for the statistical analysis of muscle  
39 inflammation. On the other hand, the disadvantages of FDG PET include the considerable costs  
40 incurred and exposure to ionizing radiation. It is important to keep in mind that FDG uptake in  
41 muscles is influenced by hyperglycemia, uptake by other organs, and voluntary or involuntary  
42 muscle movement during the uptake phase; therefore, careful examination is a prerequisite.<sup>25</sup>  
43  
44  
45  
46  
47  
48  
49  
50  
51  
52  
53  
54  
55  
56 Although further prospective investigations in a larger sample size are necessary, addition of FDG  
57  
58  
59  
60

PET to conventional clinical examinations may be useful for comprehensive diagnosis and management as well as investigation of the pathological mechanisms underlying PM/DM.

For peer review only

**Acknowledgements**

We would like to thank Risa Ando for her excellent technical assistance. We would like to thank  
Climson (Enago) Interactive for their English language review.

**Contributions**

MT, KF and TK were involved in study setup and draft writing. TM was involved in the analysis of  
the muscle biopsies. TK and AA contributed to the visual evaluation of FDG PET. All of the  
authors contributed to discussion of the data and review and revision of the manuscript.

**Funding**

This study was supported by JSPS KAKENHI Grant Number 25461265 (Japan).

**Competing Interests**

None.

**Ethic approval**

Tohoku University School of Medicine ethics committee.

**Provenance and peer review**

Not commissioned; externally peer reviewed.

**Data sharing statement**

No additional data are available.

## REFERENCES

1. Lazarou IN, Guerne P-A. Classification, diagnosis, and management of idiopathic inflammatory myopathies. *J Rheumatol* 2013;40:550-64.
2. Machado P, Brady S, Hanna MG. Update in inclusion body myositis. *Curr Opin Rheumatol* 2013;25:763-71.
3. Vij R, Strek ME. Diagnosis and treatment of connective tissue disease-associated interstitial lung disease. *Chest* 2013;143:814-24.
4. Engel AG, Hohlfield R. The polymyositis and dermatomyositis syndromes. 1321-1366. In *Myology* 3<sup>rd</sup> ed. Engel AG, Franzini-Armstrong C. 2004 McGraw-Hill.
5. Tansley S, Gunawardena H. The evolving spectrum of polymyositis and dermatomyositis-moving towards clinicoserological syndromes: a critical review. *Clinic Rev Allerg Immunol* 2013. DOI 10.1007/s12016-013-8387-6.
6. Maeda MH, Tsuji S, Shimizu J. Inflammatory myopathies associated with anti-mitochondrial antibodies. *Brain* 2012;1767-77.
7. Tanaka K, Sato A, Kasuga K, *et al.* Chronic myositis with cardiomyopathy and respiratory failure associated with mild organ-specific autoimmune diseases. *Clin Rheumatol* 2007;26:1917-9.
8. Gotthardt M, Bleeker-Rovers CP, Boerman OC, *et al.* Imaging of inflammation by PET, conventional scintigraphy, and other imaging techniques. *J Nucl Med* 2010;51:1937-49.
9. Kubota K, Ito K, Morooka M, *et al.* FDG PET for rheumatoid arthritis: basic considerations and whole-body PET/CT. *Ann N Y Acad Sci* 2011;1228:29-38.
10. Fuchs M, Briel M, Daikeler T, *et al.* The impact of <sup>18</sup>F-FDG PET on the management of patients with suspected large vessel vasculitis. *Eur J Nucl Med Mol Imaging* 2012;39:344-53.
11. Yamashita H, Kubota K, Takahashi Y, *et al.* Whole-body fluorodeoxyglucose positron emission

- 1  
2  
3  
4  
5  
6 tomography/computed tomography in patients with active polymyalgia rheumatica: evidence  
7  
8 for distinctive bursitis and large-vessel vasculitis. *Mod Rheumatol* 2012;22:705-11.  
9
- 10 12. Owada T, Maezawa R, Kurasawa K, *et al.* Detection of inflammatory lesions by F-18  
11  
12 fluorodeoxyglucose positron emission tomography in patients with polymyositis and  
13  
14 dermatomyositis. *J Rheumatol* 2012;39:1659-65.  
15
- 16 13. Pipitone N, Versari A, Zuccoli G, *et al.* <sup>18</sup>F-fluorodeoxyglucose positron emission tomography  
17  
18 for the assessment of myositis: a case series. *Clin Exp Rheumatol* 2012;30:570-3.  
19
- 20 14. Tanaka S, Ikeda K, Uchiyama K, *et al.* [<sup>18</sup>F]FDG uptake in proximal muscles assessed by  
21  
22 PET/CT reflects both global and local muscular inflammation and provides useful information  
23  
24 in the management of patients with polymyositis/dermatomyositis. *Rheumatol* 2013;52:1271-8.  
25  
26
- 27 15. Bohan A, Peter JB. Polymyositis and dermatomyositis. *N Engl J Med* 1975;292:344-7.  
28
- 29 16. Brooks BR, Miller RG, Swash M, *et al.* El Escorial revisited: revised criteria for the diagnosis  
30  
31 of amyotrophic lateral sclerosis. *ALS other Motor Neuron Disord* 2000;1:293-9.  
32  
33
- 34 17. Sobic-Saranovic DP, Grozdic IT, Videnovic-Ivanov J, *et al.* Responsiveness of FDG PET/CT to  
35  
36 treatment of patients with active chronic sarcoidosis. *Clin Nucl Med* 2013;38:516-21.  
37
- 38 18. Hoogendijk JE, Amato AA, Lecky BR, *et al.* 119th ENMC international workshop: trial design  
39  
40 in adult idiopathic inflammatory myopathies, with the exception of inclusion body myositis,  
41  
42 10-12 October 2003, Naarden, The Netherland. *Neuromusc Disord* 2004;14:337-45.  
43  
44
- 45 19. Studýnková JT, Charvát F, Jarošová K, *et al.* The role of MRI in the assessment of  
46  
47 polymyositis and dermatomyositis. *Rheumatol* 2007;46:1174-9.  
48
- 49 20. Yao L, Gai N. Fat-corrected T2 measurement as a marker of active muscle disease in  
50  
51 inflammatory myopathy. *Am J Rheumatol* 2012;198:W475-81.  
52
- 53 21. Degardin A, Morillon D, Lacour A, *et al.* Morphologic imaging in muscular dystrophies and  
54  
55 inflammatory myopathies. *Skeletal Radiol* 2010;39:1219-27.  
56  
57  
58  
59  
60

- 1  
2  
3  
4  
5  
6 22. Hak AE, de Paepe B, de Bleecker JL, *et al.* Dermatomyositis and polymyositis: new treatment  
7 targets on the horizon. *Neth J Med* 2011;69:410-21.  
8  
9  
10 23. Selva-O'Callaghan A, Grau JM, Gámez-Cenzano C, *et al.* Conventional cancer screening  
11 versus PET/CT in dermatomyositis/polymyositis. *Am J Med* 2010;123:558-62.  
12  
13  
14 24. Morita Y, Kuwagata S, Kato N, *et al.* <sup>18</sup>F-FDG PET/CT useful for the early detection of rapidly  
15 progressive fatal interstitial lung disease in dermatomyositis. *Intern Med* 2012;51:1613-8.  
16  
17  
18 25. Jackson RS, Schlarman TC, Hubble WL, *et al.* Prevalence and patterns of physiologic muscle  
19 uptake detected with whole-body <sup>18</sup>F-FDG PET. *J Nucl Med Technol* 2006;34:29-33.  
20  
21  
22  
23  
24  
25  
26  
27  
28  
29  
30  
31  
32  
33  
34  
35  
36  
37  
38  
39  
40  
41  
42  
43  
44  
45  
46  
47  
48  
49  
50  
51  
52  
53  
54  
55  
56  
57  
58  
59  
60



**Figure legends**

**Figure 1.** FDG PET and MRI findings in a patient with dermatomyositis (Patient 11). Serial sections of FDG PET/CT (A). Using FDG uptake in mediastinum blood vessels as a positivity criterion, positive regions were found in the paraspinal muscles, shoulders, upper arms, and lumbar girdles in a predominantly symmetrical distribution. An FDG PET image of the upper arm level (B). Frontal view of an FDG PET image indicating FDG uptake in the shoulders, upper arms, and iliopsoas (C). MRI of the thighs (D) showing high signal areas in the bilateral quadriceps femoris (T2-weighted images with fat suppression).

**Figure 2.** The numbers of vFDG-positive muscle regions are correlated with the mean SUVmax in four extremities (A). Serum values of creatinine kinase (CK) were higher in patients with more than two vFDG-positive muscle regions than in those with two or less regions (B). The number of vFDG-positive muscle regions correlated with the total histological scores (C). The mean SUVmax in four extremities correlated with the total histological scores (D). There were no differences in SUVmax in corresponding muscles between muscles with abnormal MRI signals and those without (E). In muscle regions examined by MRI, SUVmax in the corresponding muscles was higher in vFDG-positive muscles than in vFDG-negative ones (F).

**Figure 3.** FDG PET (A) and MRI findings (B) for both thighs in a patient with PM (Patient 14). Distribution patterns of high signal on MRI and FDG PET are different. The FDG uptake is localized and predominantly within the muscles.

**Figure 4.** The mean SUVmax in four extremities was higher in patients with PM/DM than in those with ALS (A). In patients with PM/DM, SUVmax of bilateral muscles was highly correlated,

1  
2  
3  
4  
5  
6 suggesting symmetrical muscle lesions (B). Correlation coefficients: bilateral quadriceps femoris,  
7  
8  $\rho = 0.91$ ,  $p < 0.0001$ ; bilateral medial and posterior compartments of the thighs,  $\rho = 0.88$ ,  $p$   
9  
10  $< 0.0001$ ; right quadriceps femoris and right medial and posterior compartments of the thighs,  
11  
12  $\rho = 0.58$ ,  $p = 0.0004$ ; left quadriceps and left medial and posterior compartments of the thighs,  
13  
14  $\rho = 0.69$ ,  $p < 0.0001$ . In patients with ALS, only a moderate correlation was found between bilateral  
15  
16 muscles (Spearman rank correlation) (C).  
17  
18  
19  
20  
21  
22  
23  
24  
25  
26  
27  
28  
29  
30  
31  
32  
33  
34  
35  
36  
37  
38  
39  
40  
41  
42  
43  
44  
45  
46  
47  
48  
49  
50  
51  
52  
53  
54  
55  
56  
57  
58  
59  
60

Table 1 Summary of patients with PM/DM

| Clinical findings                     |     |                    |        |      |      |                 | Visually identified FDG uptakes in muscles§ |    |   |   |    |    |   | FDG uptakes in other organs |      |              |                 | Muscle biopsy findings¶ |         |          | MRI findings** |           |              |                       |
|---------------------------------------|-----|--------------------|--------|------|------|-----------------|---------------------------------------------|----|---|---|----|----|---|-----------------------------|------|--------------|-----------------|-------------------------|---------|----------|----------------|-----------|--------------|-----------------------|
| Age                                   | Sex | Clinical diagnosis |        | Dur* | CK†  | Therapy at PET‡ | SCM                                         | PC | S | U | PT | PL | B | T                           | Lung | Lymph nodes. | Malignancy.     | others                  | Sites   | Cell inf | Nec/reg        | Sites     | High signals | Consistency with vFDG |
| PM/DM without other collagen diseases |     |                    |        |      |      |                 |                                             |    |   |   |    |    |   |                             |      |              |                 |                         |         |          |                |           |              |                       |
| 1                                     | 24  | M                  | DM     | 1    | 3000 | 5d P80          |                                             |    |   |   |    |    |   |                             | ↑    |              |                 |                         | BB      | 2        | 3              | thigh     | (+)          | P (+)                 |
| 2                                     | 82  | M                  | DM     | 1    | 4307 | 5d P50          |                                             |    |   |   |    |    |   |                             |      |              | porta hepatis   |                         | BB      | 0        | 1              | thigh     | (+)          | (-)                   |
| 3                                     | 52  | F                  | DM     | 4    | 436  | (-)             |                                             |    |   |   |    |    |   |                             |      |              |                 |                         | BB      | 3        | 3              | thigh     | (+)          | P (+)                 |
| 4                                     | 20  | F                  | DM     | 3    | 312  | (-)             |                                             |    |   |   |    |    |   |                             | ↑    |              |                 |                         | BB      | 0        | 1              | thigh     | (+)          | (-)                   |
| 5                                     | 37  | F                  | DM ILD | 1    | 783  | 7d P20          |                                             |    |   |   |    |    |   |                             | ↑    |              |                 |                         | BB      | 1        | 1              | thigh     | (+)          | (-)                   |
| 6                                     | 33  | F                  | DM     | 3    | 51   | (-)             |                                             |    |   |   |    |    |   |                             | ↑    |              | stomach, uterus |                         | BB      | 1        | 1              | Not done  |              |                       |
| 7                                     | 33  | F                  | DM     | 2    | 274  | (-)             |                                             |    |   |   |    |    |   |                             | ↑    |              | marrow, spleen  |                         | BB      | 0        | 0              | Not done  |              |                       |
| 8                                     | 73  | F                  | DM     | 1    | 182  | (-)             |                                             |    |   |   |    |    |   |                             | ↑    |              | stomach         |                         | BB      | 3        | 3              | Not done  |              |                       |
| 9                                     | 66  | M                  | DM     | 4    | 239  | (-)             |                                             |    |   |   |    |    |   |                             |      |              |                 |                         | BB      | 0        | 2              | should.br | (+)          | (-)                   |
| 10                                    | 65  | M                  | DM     | 2    | 377  | (-)             |                                             |    |   |   |    |    |   |                             | ↑    |              | lung            |                         | Deltoid | 1        | 2              | brachium  | (+)          | (-)                   |
| 11                                    | 53  | M                  | DM     | 4    | 2488 | (-)             |                                             |    |   |   |    |    |   |                             |      |              |                 |                         | BB      | 2        | 2              | thigh     | (+)          | (-)                   |
| 12                                    | 25  | F                  | PM     | 4    | 926  | (-)             |                                             |    |   |   |    |    |   |                             |      |              |                 |                         | BB      | 2        | 0              | thigh     | (+)          | (-)                   |
| 13                                    | 76  | F                  | PM ILD | 2    | 1343 | (-)             |                                             |    |   |   |    |    |   |                             | ↑    |              |                 |                         | BB      | 1        | 3              | thigh     | (+)          | (-)                   |
| 14                                    | 54  | M                  | PM ILD | 14   | 6347 | 2d P60          |                                             |    |   |   |    |    |   |                             | ↑    |              |                 |                         | Gastro  | 1        | 1              | thigh     | (+)          | P (+)                 |
| 15                                    | 56  | F                  | PM ILD | 8    | 362  | (-)             |                                             |    |   |   |    |    |   |                             | ↑    | ↑            | joints          |                         | QF      | 2        | 1              | thigh     | (+)          | (-)                   |
| 16                                    | 55  | F                  | PM     | 12   | 1019 | (-)             |                                             |    |   |   |    |    |   |                             | ↑    | ↑            | spleen          |                         | BB      | 1        | 1              | Not done  |              |                       |
| 17                                    | 69  | F                  | PM     | 60   | 758  | (-)             |                                             |    |   |   |    |    |   |                             |      |              | myocardium      |                         | Deltoid | 1        | 2              | Not done  |              |                       |
| 18                                    | 79  | F                  | PM     | 7    | 9627 | (-)             |                                             |    |   |   |    |    |   |                             |      |              | lung            |                         | BB      | 0        | 2              | thigh     | (+)          | (-)                   |
| 19                                    | 52  | M                  | PM     | 60   | 3372 | 9d P60          |                                             |    |   |   |    |    |   |                             |      |              |                 |                         | Deltoid | 2        | 1              | thigh     | (+)          | (-)                   |
| 20                                    | 40  | F                  | PM     | 2    | 1842 | 7d P60          |                                             |    |   |   |    |    |   |                             |      |              |                 |                         | BB      | 1        | 2              | Not done  |              |                       |

Tateyama et al.24

|                                    |    |   |           |    |      |         |  |  |  |  |  |  |  |  |  |  |           |                |    |          |          |          |     |      |
|------------------------------------|----|---|-----------|----|------|---------|--|--|--|--|--|--|--|--|--|--|-----------|----------------|----|----------|----------|----------|-----|------|
| 21                                 | 50 | F | PM        | 36 | 7182 | (-)     |  |  |  |  |  |  |  |  |  |  | BB        | 0              | 2  | brachium | (-)      | N(+)     |     |      |
| 22                                 | 73 | M | PM ILD    | 1  | 1377 | 13d P55 |  |  |  |  |  |  |  |  |  |  | diaphragm | BB             | 2  | 1        | Not done |          |     |      |
| PM/DM with other collagen diseases |    |   |           |    |      |         |  |  |  |  |  |  |  |  |  |  |           |                |    |          |          |          |     |      |
| 23                                 | 27 | F | MCTD      | 7  | 200  | 8d P50  |  |  |  |  |  |  |  |  |  |  | ↑         | salivary gland | BB | 2        | 1        | thigh    | (-) | N(+) |
| 24                                 | 72 | F | PM, SSC   | 18 | 1442 | (-)     |  |  |  |  |  |  |  |  |  |  | ↑ ↑       | pudenda        | BB | 2        | 1        | brachium | (+) | (-)  |
| 25                                 | 73 | F | PM, SSC   | 14 | 126  | (-)     |  |  |  |  |  |  |  |  |  |  | ↑         | thyroid gland. | BB | 0        | 0        | thigh    | (-) | N(+) |
| 26                                 | 70 | F | PM RA Sjs | 24 | 761  | (-)     |  |  |  |  |  |  |  |  |  |  | ↑ ↑       |                | BB | 2        | 2        | thigh    | (+) | (-)  |
| 27                                 | 72 | F | PM CREST  | 36 | 386  | (-)     |  |  |  |  |  |  |  |  |  |  | ↑         | joints         | QF | 2        | 1        | thigh    | (+) | (-)  |
| 28                                 | 42 | M | MCTD      | 3  | 5585 | (-)     |  |  |  |  |  |  |  |  |  |  | ↑         |                | BB | 3        | 3        | thigh    | (+) | (-)  |
| 29                                 | 65 | F | PM Sjs    | 2  | 1764 | (-)     |  |  |  |  |  |  |  |  |  |  | ↑ ↑       | joints         | BB | 2        | 2        | thigh    | (-) | N(+) |
| 30                                 | 70 | F | PM RA     | 3  | 1050 | (-)     |  |  |  |  |  |  |  |  |  |  | ↑ ↑       |                | QF | 2        | 1        | Not done |     |      |
| 31                                 | 63 | M | PM SSC    | 7  | 1396 | (-)     |  |  |  |  |  |  |  |  |  |  |           |                | BB | 1        | 2        | brachium | (-) | N(+) |
| 32                                 | 52 | F | PM SSC    | 1  | 1142 | (-)     |  |  |  |  |  |  |  |  |  |  | ↑ ↑       |                | BB | 0        | 1        | brachium | (+) | (-)  |
| 33                                 | 75 | F | MCTD      | 7  | 2123 | (-)     |  |  |  |  |  |  |  |  |  |  |           | peritoneum     | BB | 2        | 2        | brachium | (+) | P(+) |

\*Duration of illness (months).

†Serum creatine kinase (CK) levels (IU/L).

‡Duration (days, d) and daily dose (mg) of prednisolone (P) at the time of the PET study.

§The regions of positive vFDG at least in either side of the region are filled. vFDG-positivity criterion is described in Material and Methods.

¶The criteria for grading of pathological findings is described in Material and Methods.

\*\*P (+), both PET and MRI showed positive findings; N (+), both PET and MRI were negative; (-), either PET or MRI showed positive findings.

B, buttock; BB, biceps brachii; cell inf, mononuclear cell infiltration; CREST, CREST syndrome; DM, dermatomyositis; Gastro, gastrocnemius; ILD, interstitial lung disease; MCTD, mixed connective tissue disease; nec/reg, muscle fiber necrosis and regeneration; PC, paraspinal muscles at cervical levels; PL, paraspinal muscles at lumbar levels; PM, polymyositis; PT, paraspinal muscles at thoracic levels; QF, quadriceps femoris; RA, rheumatoid arthritis; S, shoulders; SCM, sternocleidomastoid muscles; Sjs, Sjögren syndrome; SSC, systemic sclerosis; T, thighs.

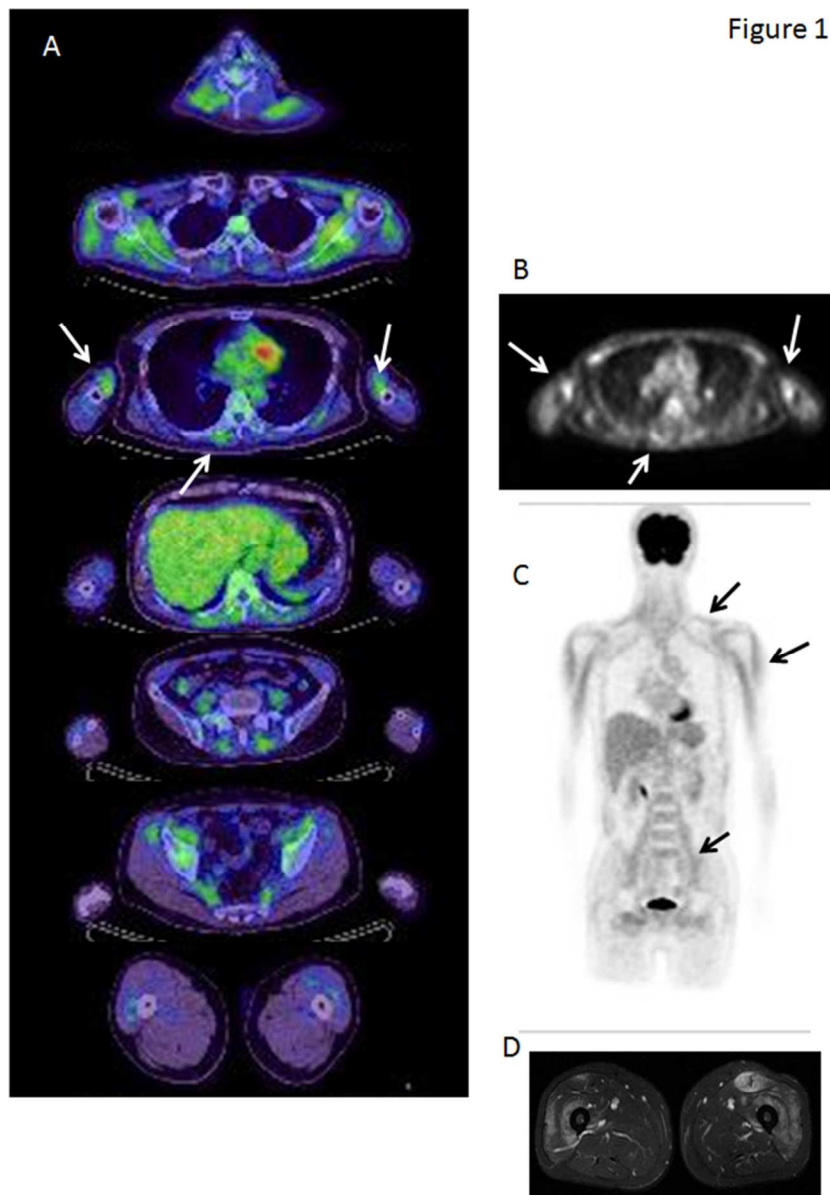

Figure 1. FDG PET and MRI findings in a patient with dermatomyositis (Patient 11). Serial sections of FDG PET/CT (A). Using FDG uptake in mediastinum blood vessels as a positivity criterion, positive regions were found in the paraspinal muscles, shoulders, upper arms, and lumbar girdles in a predominantly symmetrical distribution. An FDG PET image of the upper arm level (B). Frontal view of an FDG PET image indicating FDG uptake in the shoulders, upper arms, and iliopsoas (C). MRI of the thighs (D) showing high signal areas in the bilateral quadriceps femoris (T2-weighted images with fat suppression).  
76x102mm (600 x 600 DPI)

Figure 2

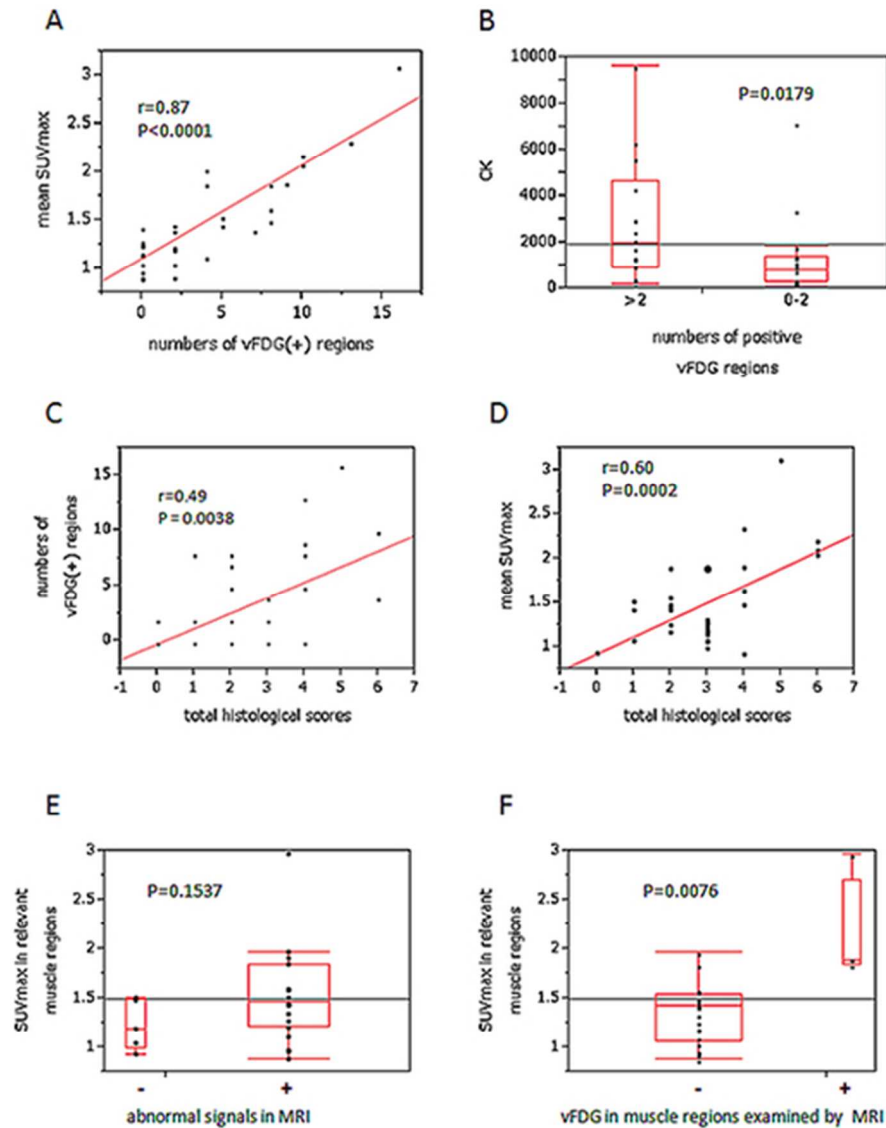

Figure 2. The numbers of vFDG-positive muscle regions are correlated with the mean SUVmax in four extremities (A). Serum values of creatinine kinase (CK) were higher in patients with more than two vFDG-positive muscle regions than in those with two or less regions (B). The number of vFDG-positive muscle regions correlated with the total histological scores (C). The mean SUVmax in four extremities correlated with the total histological scores (D). There were no differences in SUVmax in corresponding muscles between muscles with abnormal MRI signals and those without (E). In muscle regions examined by MRI, SUVmax in the corresponding muscles was higher in vFDG-positive muscles than in vFDG-negative ones (F).  
22x29mm (600 x 600 DPI)

Figure 3

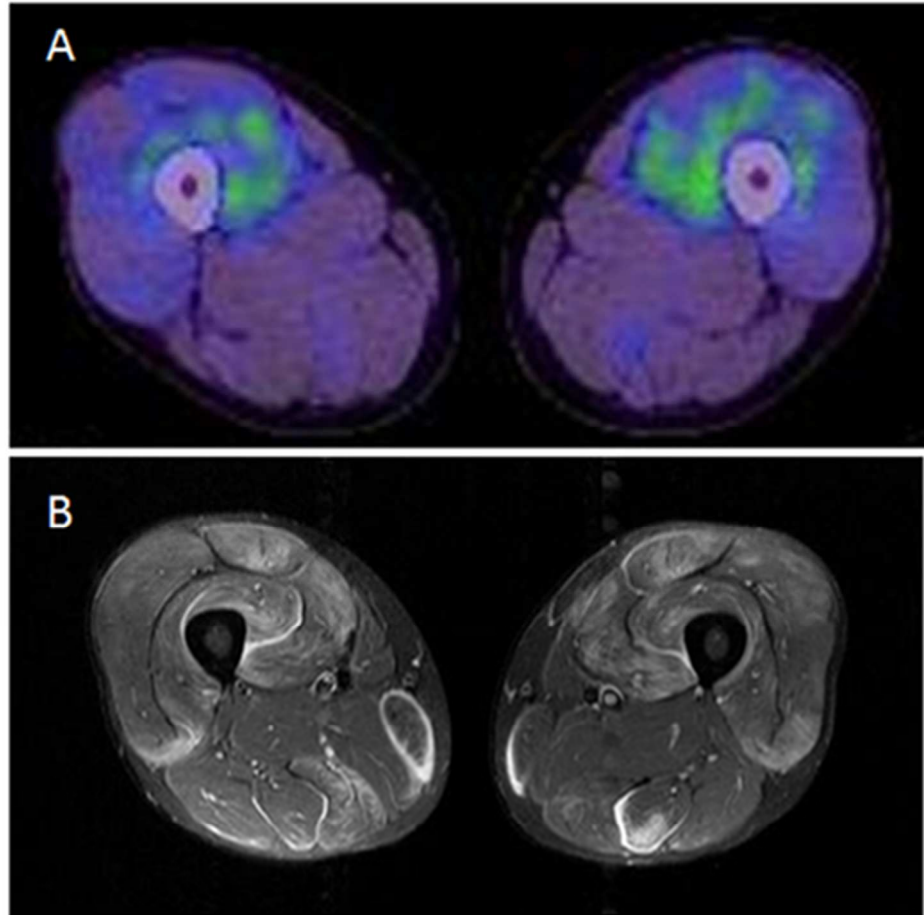

Figure 3. FDG PET (A) and MRI findings (B) for both thighs in a patient with PM (Patient 14). Distribution patterns of high signal on MRI and FDG PET are different. The FDG uptake is localized and predominantly within the muscles.

46x50mm (300 x 300 DPI)

Figure 4

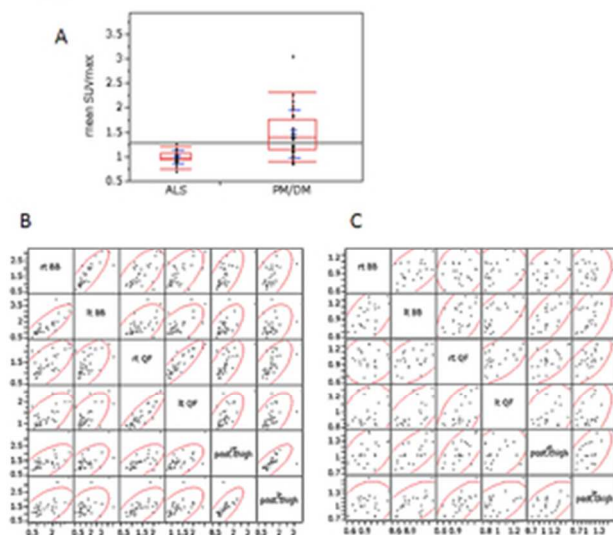

Figure 4. The mean SUVmax in four extremities was higher in patients with PM/DM than in those with ALS (A). In patients with PM/DM, SUVmax of bilateral muscles was highly correlated, 13x12mm (600 x 600 DPI)

review only



1  
2  
3  
4  
5  
6 Clinical values of FDG PET in polymyositis and dermatomyositis syndromes: imaging of skeletal  
7  
8 muscle inflammation  
9

10  
11  
12  
13  
14 Maki Tateyama<sup>1,2</sup>, Kazuo Fujihara<sup>1</sup>, Tatsuro Misu<sup>1</sup>, Akira Arai<sup>3</sup>, Tomohiro Kaneta<sup>3</sup>, Masashi Aoki<sup>1</sup>  
15  
16

17  
18  
19 <sup>1</sup>Department of Neurology, Tohoku University School of Medicine  
20

21 <sup>2</sup>Department of Neurology, Iwate National Hospital  
22

23 <sup>3</sup>Department of Diagnostic Radiology, Tohoku University School of Medicine  
24  
25  
26  
27  
28  
29

30 Corresponding author  
31

32 Maki Tateyama  
33

34 Department of Neurology, Iwate National Hospital  
35

36 48 Yamanome, Ichinoseki, 021-0056, Iwate, Japan,  
37

38 Tel: +81-191-25-2221  
39

40 e-mail: mtateyama@iwate-h.com  
41  
42  
43  
44  
45  
46

47 Keywords: inflammatory myopathies, polymyositis, dermatomyositis, FDG PET, FDG PET/CT,  
48

49 MRI  
50  
51  
52

53 Word count: text, 3704 words; abstract, 283 words; 1 table, 4 figures, 25 references  
54  
55  
56  
57  
58  
59  
60

**ABSTRACT**

**Objectives:** [ $^{18}\text{F}$ ] fluorodeoxyglucose positron emission tomography (FDG PET), a standard tool for evaluating malignancies, can also detect inflammatory lesions. However, its usefulness in evaluating muscle lesions in polymyositis and dermatomyositis syndromes (PM/DM) has not been established.

**Methods:** Thirty-three patients with PM/DM who had undergone FDG PET were retrospectively analyzed. FDG uptake was visually evaluated (visually identified FDG uptake, vFDG) in 16 regions of the body using mediastinum blood vessels as a positivity criterion. We also calculated the maximum standardized uptake value (SUVmax) in all four limbs of the patients with PM/DM as well as in 22 patients with amyotrophic lateral sclerosis (ALS) with similar disabilities. In 24 patients with PM/DM, MRI and FDG PET findings were compared.

**Results:** vFDG was observed in multiple muscle lesions with varying distributions in two-thirds of the PM/DM patients, with most lesions being symmetrical. The number of vFDG-positive regions strongly correlated with the mean SUVmax in all four limbs ( $p < 0.0001$ ). Histological grades of biopsied muscles correlated with both the mean SUVmax and number of vFDG-positive regions. Serum creatine kinase levels were higher in patients with more than two vFDG-positive regions than in those with two or less regions ( $p < 0.05$ ). While the inflamed muscles showed diffuse, patchy, or marginal signal abnormalities on MRI, FDG uptake was most prominent inside the muscles. Compared with ALS, the mean SUVmax was significantly higher in the PM/DM patients ( $p < 0.0001$ ) and showed a striking correlation in the bilateral muscles reflecting symmetrical muscle involvement in PM/DM.

**Conclusions:** The visual assessment of FDG uptake as well as calculation of SUV enabled us to comprehensively evaluate skeletal muscle. This method can improve clinical practices and provide insights into pathomechanisms of PM/DM.

### Strengths and limitations of this study

This is the first study that comprehensively investigated the usefulness of FDG PET in evaluating muscle lesions in patients with polymyositis dermatomyositis syndromes using visual evaluation and SUV measurement. **The study demonstrated the usefulness of these two methods. Visual evaluation of FDG uptake can be used in clinical practice.**

The limitation of the study is that it is retrospective. Patients underwent FDG PET for the detection of occult cancer, therefore, the imaging range was from the head to the middle of the thighs. **Eight patients underwent FDG PET and 25 patients underwent FDG PET/CT. Data regarding manual muscle test was not obtained. Polymyositis dermatomyositis syndromes and non-inflammatory myopathies were not compared.**

## INTRODUCTION

Idiopathic inflammatory myopathies are a heterogeneous group of disorders clinically characterized by progressive proximal muscle weakness and pathologically by mononuclear cell infiltration and fiber necrosis in muscles. Polymyositis (PM), dermatomyositis (DM), and inclusion body myositis are representative phenotypes.<sup>1</sup> Both PM and DM are thought to be immune-mediated disorders that can be successfully treated if properly managed. In contrast, in inclusion body myositis, degenerative processes also play an equal or greater role and effective treatments remain to be elucidated.<sup>2</sup> Patients with PM and DM syndromes (PM/DM) may present with other organ involvement, such as interstitial lung disease.<sup>3,4</sup> They may also evolve with other collagen diseases and malignancies.<sup>4,5</sup> In addition, the extent and pattern of muscle involvement are variable. PM/DM can present with prominent truncal muscle weakness or preferential involvement of respiratory muscles.<sup>6,7</sup> Thus, it is essential to systemically diagnose and evaluate patients with PM/DM.

[<sup>18</sup>F] fluorodeoxyglucose positron emission tomography (FDG PET) is a standard tool for detecting malignancies. FDG also accumulates in inflammatory lesions where glucose-consuming inflammatory cells infiltrate.<sup>8</sup> FDG PET is useful for diagnosing systemic inflammatory diseases, including collagen vascular disorders such as rheumatoid arthritis, vasculitis, and polymyalgia rheumatica.<sup>9-11</sup> In PM/DM, only a limited number of studies have demonstrated FDG PET detection of inflammatory muscle lesions. Owada et al. visually assessed FDG uptake (FDG uptake greater than or equal to that of the liver) in proximal muscles using FDG PET in 24 patients with PM/DM. They found that increased FDG uptake was more frequent in patients with PM/DM than in controls (33% versus 2%).<sup>12</sup> Pipitone et al. measured the maximum standardized uptake value (SUVmax) in the proximal muscles of all four limbs and calculated the muscle/liver SUVmax ratio in 12 patients with PM/DM using FDG PET/computed tomography (CT). They showed that the proximal muscle

1  
2  
3  
4  
5 SUV ratio was higher in patients with PM/DM than in controls.<sup>13</sup> In these two studies, increased  
6  
7  
8 FDG uptake in proximal muscles did not correlate with clinical parameters or MRI findings. In  
9  
10 contrast, Tanaka et al. measured the mean SUV using FDG PET/CT in 14 proximal muscle groups  
11  
12 of 20 patients with PM/DM and demonstrated that an increased SUV in proximal muscles of  
13  
14 myositis patients as well as the mean proximal muscle SUV was correlated with serum creatine  
15  
16 kinase (CK) and muscle strength.<sup>14</sup> They also found that local SUV correlated with the degree of  
17  
18 inflammation in muscle biopsies and weakness of the corresponding muscles. However, their  
19  
20 method using global SUV calculations may not be feasible in daily clinical practice. **For successful**  
21  
22 **clinical application of FDG PET, a simple and reliable way to assess PM/DM muscles is preferable.**  
23  
24

25  
26 In this study, we visually evaluated FDG PET findings in patients with PM/DM in detail and  
27  
28 determined the extent and pattern of inflammation. We compared visually evaluated FDG PET  
29  
30 findings with SUVmax in proximal muscles as well as with clinical and pathological findings. **We**  
31  
32 **also compared MRI findings with FDG uptake in the same muscle regions. Furthermore, we**  
33  
34 **compared SUVmax in proximal muscles between patients with PM/DM and those with ALS.**  
35  
36

## 37 38 **MATERIALS AND METHODS**

### 39 40 **Patients**

41  
42 Thirty-three patients with recent-onset PM/DM were enrolled in this study. Patients underwent  
43  
44 FDG PET or FDG PET/CT to investigate malignancies before or shortly after receiving an initial  
45  
46 corticosteroid treatment from January 2009 to July 2013. They were identified by a retrospective  
47  
48 review of medical records in our department. Clinically, patients showed symmetrical proximal  
49  
50 muscle weakness, elevated serum muscle enzymes, and myositis-compatible electrophysiological  
51  
52 findings **proposed by Bohan and Peter.**<sup>15</sup> **Muscle biopsies were conducted in all patients and**  
53  
54 **showed inflammatory infiltrates, muscle fiber necrosis, and/or expression of HLA class 1 on**  
55  
56  
57  
58  
59  
60

1  
2  
3  
4  
5  
6 muscle fibers. A few patients showed either inflammatory infiltrates or muscle fiber necrosis. In  
7  
8 these patients, other muscle diseases were carefully excluded. Subsequent therapy with  
9  
10 corticosteroids alone or additional immunomodulatory therapies were effective in all but one  
11  
12 patient who died before treatment initiation. Clinical records, laboratory data, and muscle MRIs  
13  
14 from each patient were collected. Patients with inclusion body myositis were not included. We  
15  
16 identified 22 patients with amyotrophic lateral sclerosis (ALS) who were admitted to our hospital  
17  
18 for diagnosis and had undergone FDG PET/CT for the detection of occult cancer. These patients  
19  
20 were included in this study as disease controls. Eighteen patients fulfilled the diagnostic criteria for  
21  
22 clinically definite, clinically probable, or clinically probable-laboratory supported ALS according to  
23  
24 the revised El Escorial criteria of the World Federation of Neurology.<sup>16</sup> Four patients showed only  
25  
26 lower motor neuron symptoms with exclusion of other diseases. Degrees of disability in patients  
27  
28 with PM/DM and those with ALS were similar; all of these patients were able to walk and  
29  
30 performed activities of daily life independently, but with some difficulties. The study was approved  
31  
32 by the Tohoku University School of Medicine ethics committee.  
33  
34  
35  
36  
37

### 38 **FDG PET imaging**

39  
40 Patients fasted for a minimum of 4 h before the <sup>18</sup>F-FDG injection. Blood glucose levels were  
41  
42 measured, and patients with blood levels > 150 mg/dl were not included. After injection of  
43  
44 approximately 185 MBq (3.1 MBq/kg) of <sup>18</sup>F-FDG, the patients rested on the bed for 1 hour. PET  
45  
46 scan was then performed from the head to the mid-thigh using a PET scanner (ECAT EXACT HR+,  
47  
48 Siemens, Erlangen, Germany) or PET/CT scanner (Biograph Duo or 40, Siemens, Erlangen,  
49  
50 Germany). PET/CT scanners have been used since April 2009 and have replaced a dedicated PET  
51  
52 scanner in our institute. FDG uptake was visually evaluated (visually identified FDG uptake,  
53  
54 vFDG) in skeletal muscles using dedicated workstations by two radiologists (AA, TK). FDG uptake  
55  
56  
57  
58  
59  
60

1  
2  
3  
4  
5  
6 was independently assessed in a blinded manner. vFDG was evaluated in 16 regions, including the  
7  
8 upper arms: shoulders: sternocleidomastoid muscles: paraspinal muscles of cervical, thoracic, and  
9  
10 lumbar levels: buttocks: and upper part of the thighs in both sides (Figure 1). **Regions with an FDG**  
11  
12 **uptake greater than or equal to that of the mediastinum blood vessels were considered**  
13  
14 **vFDG-positive.<sup>17</sup> Regions judged to be positive by both radiologists were defined as**  
15  
16 **vFDG-positive and the number of vFDG- positive regions were counted (minimum = 0 and**  
17  
18 **maximum = 16 in each patient).** In addition, SUV was calculated in patients with PM/DM and in 22  
19  
20 patients with ALS in the biceps brachii, quadriceps femoris, and medial and posterior  
21  
22 compartments of the thigh (hamstrings, abductor magnus, gracilis) on both sides. In one PM patient,  
23  
24 we were not able to calculate SUV in the biceps brachii, because the sectional area of the muscle  
25  
26 was of insufficient size to place the region of interest (ROI). The ROI (20mm) was placed in the  
27  
28 highest FDG uptake area in each muscle region. SUV was calculated as both the maximum value  
29  
30 (SUVmax) and mean value (SUVmean) in ROIs. The mean proximal muscles SUVmax (mean  
31  
32 SUVmax) and SUVmean (mean SUVmean) were calculated by averaging the values obtained for  
33  
34 the six muscle regions.

### 40 **Muscle MRI**

41  
42 Muscle MRI was performed during a routine examination using the 1.5T Intera scanner  
43  
44 (Philips, Best, the Netherlands) before treatment. Results were assessed by experienced radiologists.  
45  
46 Abnormal signals in skeletal muscles were identified on T2-weighted images with fat suppression  
47  
48 (T2W/FS) or short tau inversion recovery (STIR) sequence with long TE. In the patients who also  
49  
50 underwent gadolinium contrast-enhancement, abnormal enhancement in the muscle and/or muscle  
51  
52 fascia was evaluated.  
53  
54  
55  
56  
57  
58  
59  
60

## Muscle biopsy

Muscle biopsies were obtained before treatment in all patients with PM/DM. The muscle was taken from the biceps brachii (26 patients), deltoid (three patients), quadriceps femoris (three patients), and gastrocnemius (one patient). Biopsied muscles were snap frozen and a routine histochemical study was conducted. The most affected lesions in each specimen were photographed with objective lens of 10-fold magnifications. Histological findings were assessed in a blinded manner by an experienced neurologist well versed in neuropathology (TM). The extent of mononuclear cell infiltration (**mononuclear cell infiltration score**) was graded as follows: 0, none or slight; 1, one focus of mononuclear cell infiltration; 2, more than one focus of mononuclear cell infiltration; and 3, diffuse mononuclear cell infiltration. Muscle fiber necrosis and regeneration (**necrosis/regeneration score**) were graded as follows: 0, none; 1, 1% or less of muscle fibers showing necrosis or regeneration; 2, more than 1% and no more than 10% of muscle fibers showing necrosis or regeneration; and 3, more than 10% of muscle fibers showing necrosis or regeneration. The total histological scores were calculated for each patient by adding the mononuclear cell infiltration and the necrosis/regeneration scores.

## Statistical analysis

Statistical analysis was performed using JNP8 software (SAS Institute Inc., Cary, NC, USA). Statistical significance was analyzed by the Wilcoxon rank sum test (nonparametric), simple regression analysis, and Spearman rank correlation. Comparisons were considered to be statistically significant if  $p < 0.05$ .

## RESULTS

### Patient characteristics



1  
2  
3  
4  
5  
6 The characteristics of the 33 patients with PM/DM (10 males, 23 females; mean age  $56 \pm$   
7  
8 17.9 years) who underwent FDG PET (eight patients) or FDG PET/CT (25 patients) are  
9  
10 summarized in Table1. FDG PET was performed before any treatment in 25 patients. In eight  
11  
12 patients, FDG PET was performed shortly after beginning corticosteroid treatment (2 - 9 days:  
13  
14 mean 6.1 days). We provisionally divided PM/DM patients according to the presence or absence of  
15  
16 other collagen diseases. The number of patients in each clinical group and those of relevant  
17  
18 clinicopathological classifications proposed in the 119th European Neuromuscular Centre  
19  
20 international workshop<sup>18</sup> in each clinical group (parenthesis) were as follows: 11 DM patients  
21  
22 without other collagen diseases (four patients with definite DM, seven with probable DM), 11 PM  
23  
24 patients without other collagen diseases (nine patients with nonspecific myositis, one with definite  
25  
26 PM, and one with probable PM), and 11 PM/DM patients with other collagen diseases (eight  
27  
28 patients with nonspecific myositis, two with probable PM, and one with definite PM). Two patients  
29  
30 with DM and one with PM without other collagen diseases were shown to have malignancies.  
31  
32 Abnormal FDG uptake was noted in the lung in several patients, and most were diagnosed as  
33  
34 having interstitial lung diseases. FDG uptake in the lymph nodes was observed in 50% of patients  
35  
36 with DM, 18.2% of patients with PM without other collagen diseases, and 75% of patients with  
37  
38 PM/DM with other collagen diseases.  
39  
40  
41  
42  
43  
44

#### 45 **Visual assessment of FDG uptake in skeletal muscles of patients with PM/DM**

46  
47 vFDG in skeletal muscles was observed in 20/33 patients with PM/DM (60.6%). vFDG was  
48  
49 detected in multiple regions in 14 patients (42.4%) with various patterns (Table1) and almost  
50  
51 symmetrical distribution. The shoulders and buttocks were the most frequent vFDG-positive  
52  
53 regions. A fraction of patients with DM showed vFDG-positivity in most of the regions: a  
54  
55 representative case is shown in Figure 1. The number of vFDG-positive regions correlated with the  
56  
57  
58  
59  
60

1  
2  
3  
4  
5  
6 mean SUVmax of all four extremities ( $r = 0.87$ ,  $p < 0.0001$ ; Fig. 2A), implying that SUVmax in  
7  
8 extremities could be inferred by the extent of vFDG-positive regions. There was no correlation  
9  
10 between serum CK levels and the number of vFDG-positive regions ( $p = 0.20$ ). However, serum  
11  
12 CK levels were higher in patients with more than two vFDG-positive regions than in those with two  
13  
14 or less vFDG-positive regions ( $p = 0.0179$ ; Fig. 2B). The number of vFDG-positive regions also  
15  
16 correlated with the total histological score ( $r = 0.49$ ,  $p = 0.0038$ ; Fig. 2C). The number of  
17  
18 vFDG-positive regions correlated with necrosis/regeneration scores ( $r = 0.49$ ,  $p = 0.0036$ ), but not  
19  
20 with mononuclear cell infiltration scores ( $p = 0.06$ ).  
21  
22  
23  
24

#### 25 Relationship between SUV and clinicopathological findings in patients with PM/DM

26  
27 The mean SUVmax did not correlate with the duration of the illness. The mean SUVmax was  
28  
29 higher in males than females, although not significant ( $p = 0.075$ ). There were no significant  
30  
31 differences among patients with DM without other collagen diseases, PM without other collagen  
32  
33 diseases, and PM/DM with other collagen diseases. The total histological score correlated with the  
34  
35 mean SUVmax ( $r = 0.60$ ,  $p = 0.0002$ ; Fig. 2D). The mean SUVmax correlated more strongly with  
36  
37 necrosis/regeneration scores ( $r = 0.61$ ,  $p = 0.0002$ ) than with mononuclear cell infiltration scores ( $r$   
38  
39  $= 0.40$ ,  $p = 0.0198$ ). The total pathological score also correlated with SUVmax in the biopsied  
40  
41 muscles in the patients with PM/DM in whom biopsies were done in biceps brahii or quadriceps  
42  
43 femoris ( $r = 0.58$ ,  $p = 0.0017$ ). SUVmax in the biopsied muscles correlated more strongly with  
44  
45 necrosis/regeneration scores ( $r = 0.59$ ,  $p = 0.0013$ ) than mononuclear cell infiltration scores ( $r =$   
46  
47  $0.40$ ,  $p = 0.0361$ ). On the other hand, the mean SUVmax did not correlate with serum CK levels.  
48  
49 Serum CK levels did not correlate with total histological scores ( $p = 0.08$ ), necrosis/regeneration  
50  
51 scores ( $p = 0.22$ ), and mononuclear cell infiltration scores ( $p = 0.32$ ).  
52  
53  
54  
55  
56  
57  
58  
59  
60

### Comparison of FDG PET and MRI findings in PM/DM

Twenty-five patients with PM/DM underwent both FDG PET and muscle MRI. Muscle MRI was performed for the thighs (18 patients), upper arms (six patients), and shoulders (one patient). Twenty patients were judged to be MRI positive. In the MRI-positive regions of each patient, vFDG was positive in four patients. **There were no patients that were MRI-negative and vFDG-positive.** There was no difference in SUVmax of the muscles between MRI-positive and MRI-negative muscles ( $p = 0.1537$ ; Fig. 2E). In contrast, SUVmax of relevant muscles was significantly higher in vFDG-positive patients than in vFDG-negative patients ( $p = 0.0076$ ; Fig. 2F). These findings suggest that MRI is a sensitive tool for detecting inflammatory edema. However, high signals on MRI may not simply reflect the degree of inflammation.

Interestingly, the pattern of abnormal signals was different between FDG PET and MRI (Figs. 1 & 3). **On MRI, affected muscles showed several patterns including diffuse or patchy high signals and high signals surrounding the muscles, which may reflect inflammatory edema (Figs 1 & 3).** In contrast, FDG uptake was more localized in each muscle for most patients. The highest uptake was predominantly within muscles, a few centimeters from the muscle surface.

### SUVmax in the skeletal muscles of patients with PM/DM and ALS

The mean SUVmax was higher in patients with PM/DM than in those with ALS ( $1.463 \pm 0.483$  versus  $1.004 \pm 0.136$ ,  $p < 0.0001$ ; Fig. 4A). The mean SUVmean was also higher in patients with PM/DM ( $1.106 \pm 0.370$  versus  $0.733 \pm 0.139$ ,  $p < 0.0001$ ).

The SUVmax in the biceps brachii, quadriceps femoris, and medial and posterior compartments of the thigh in both sides was compared. In patients with PM/DM, SUVmax of one muscle region and that of another muscle region was correlated (biceps brachii versus medial and posterior compartments of the thigh, quadriceps versus biceps brachii, quadriceps versus medial

1  
2  
3  
4  
5  
6 and posterior compartments of the thigh). Moreover, there was a striking correlation between the  
7  
8 same muscles on both sides (biceps brachii, quadriceps femoris, medial and posterior compartments  
9  
10 of the thigh). The scatter plots suggested symmetrical muscle involvement in PM/DM (Fig. 4B).  
11  
12 Only moderate symmetry in SUVmax was found in patients with ALS (Fig. 4C).  
13

## 14 15 16 17 **DISCUSSION**

18  
19 In the present study, we assessed the skeletal muscles of patients with PM/DM using FDG  
20  
21 PET in two ways: visual assessment and SUV measurement. We found that the mean SUVmax in  
22  
23 four extremities of PM/DM patients was approximately 1.5, and the mean SUVmean was  
24  
25 approximately 1.1. These results are consistent with those of previous studies.<sup>13 14</sup> While a major  
26  
27 mechanism underlying FDG accumulation in inflamed tissue caused by rheumatoid arthritis is  
28  
29 uptake by metabolically active cells such as macrophages, young granulation tissue, and  
30  
31 fibroblasts,<sup>8 9</sup> there has been no report on PM/DM. In the present study, we found that SUVmax of  
32  
33 biopsied muscles correlated more strongly with necrosis/regeneration scores than with mononuclear  
34  
35 cell infiltration scores. These findings imply that macrophages assembled in necrotic muscle fiber  
36  
37 lesions and muscle fibers in regeneration stage may be a major background of FDG uptake in  
38  
39 PM/DM.  
40  
41

42  
43 Because FDG uptake in inflamed muscles is fairly moderate compared with that in the  
44  
45 neoplasm, setting an appropriate criterion for visual assessment is challenging. In a previous study  
46  
47 using liver in which an SUV of approximately 3 was the positivity criterion, 33% patients with  
48  
49 PM/DM had FDG-positive muscle regions.<sup>12</sup> In the present study, we chose the mediastinum blood  
50  
51 vessels, wherein SUV is approximately 2, as a positivity criterion for vFDG.<sup>17</sup> We found that  
52  
53 60.6% patients with PM/DM had vFDG-positive muscle regions. In addition, we divided the  
54  
55 proximal body muscle into 16 regions, which enabled us to evaluate the extent and patterns of  
56  
57  
58  
59  
60

1  
2  
3  
4  
5  
6 vFDG-positive regions. Most notably, the extent of vFDG-positive regions correlated with the  
7  
8 mean SUVmax and histological findings. There was only a mild correlation between the extent of  
9  
10 vFDG-positive regions and serum CK levels. Serum CK levels are a major clinical parameter in  
11  
12 PM/DM: however, it did not correlate with pathological severity in our patients. These findings  
13  
14 suggest that vFDG, using mediastinum blood vessels as the positivity criterion, is useful for the  
15  
16 assessment of systemic muscle lesions and that the extent of vFDG-positive regions can be an  
17  
18 indicator of the disease activity in PM/DM.  
19

20  
21 We also evaluated vFDG using another scoring system, in which 1 point was assigned when  
22  
23 the FDG uptake was greater than or equal to that of mediastinum blood vessels and 2 points  
24  
25 assigned when FDG uptake was greater than or equal to that of the liver. The points given by two  
26  
27 examiners were added in all the muscle regions in each patient (scores ranged from 0 to 64). These  
28  
29 scores also strongly correlated with the mean SUVmax ( $r = 0.90$ ,  $p < 0.0001$ ) and total histological  
30  
31 scores ( $p = 0.0014$ ).  
32

33  
34 MRI is now widely used to diagnose and determine biopsy sites in PM/DM.<sup>19,20</sup> It can  
35  
36 sensitively detect muscle edema in diseased muscle, including inflammatory myopathies.<sup>21</sup> Because  
37  
38 MRI detects inflammatory edema and FDG PET detects FDG uptake by metabolically active cells,  
39  
40 the images produced by the two modalities are different. In fact, MRI positivity did not correlate  
41  
42 with SUVmax in the same muscles in the present study. On MRI images, abnormal signals were  
43  
44 appeared as diffuse or patchy patterns in the muscles and sometimes surrounding the muscles. On  
45  
46 the other hand, FDG uptake tended to localize and was frequently found deep within each muscle.  
47  
48 Because FDG uptake theoretically reflects metabolically active sites, the pathology of the biopsied  
49  
50 muscles may not represent the most affected lesions. This may be the reason why we only found a  
51  
52 moderate correlation between the grade of pathological findings and SUVmax of corresponding  
53  
54 muscles. In the present study, abnormal MRI signals were positive in 20/25 patients, while vFDG  
55  
56  
57  
58  
59  
60

1  
2  
3  
4  
5  
6 was positive in four: therefore, the sensitivity of MRI seems to be superior. However, MRI was not  
7  
8 evaluated in a blinded manner in this study, and comparison was only performed for MRI  
9  
10 examination sites; other sites such as the paraspinal muscles and buttocks were not compared.  
11  
12 Further investigation is required to clarify the precise nature of abnormal signals using these two  
13  
14 measures.  
15

16  
17 Previous reports have shown that SUV in skeletal muscles is higher in patients with PM/DM  
18  
19 than in control patients without disability.<sup>13 14</sup> Comparisons of SUV between patients with PM/DM  
20  
21 and disabled control patients have never been reported. ALS is characterized by progressive muscle  
22  
23 weakness caused by degeneration of the upper and lower motor neurons. We found that the mean  
24  
25 SUVmax was significantly higher in patients with PM/DM patients than in those with ALS. These  
26  
27 findings suggest that FDG PET can distinguish between muscle weakness resulting from muscle  
28  
29 fiber destruction with inflammation and that resulting from neurogenic atrophy.  
30

31  
32 PM/DM is clinically characterized by symmetrical proximal muscle weakness.<sup>4</sup> In the  
33  
34 present study, we found a strong correlation between SUVmax of the same muscles on both sides  
35  
36 including bilateral quadriceps femoris, bilateral medial and posterior compartments of the thighs,  
37  
38 and bilateral biceps brachii. The correlation coefficient was higher for quadriceps femoris in both  
39  
40 sides and medial and posterior compartments of the thigh in both sides than in quadriceps femoris  
41  
42 and medial and posterior compartments of the same side of the legs. These findings statistically  
43  
44 verified that the inflammatory muscle damage progresses symmetrically in PM/DM, although  
45  
46 muscle lesions are often multifocal in each muscle. The current pathological mechanism of PM/DM  
47  
48 based on immunopathology cannot explain the symmetrical muscle damage in PM/DM.<sup>4 22</sup> Several  
49  
50 possible mechanisms may explain the symmetry, such as an involvement of anatomical factors,  
51  
52 including vasculatures and peripheral nerves, or some immune or physiological factors of  
53  
54 individual muscles that can influence the extent of inflammation.  
55  
56  
57  
58  
59  
60

1  
2  
3  
4  
5  
6 The present study has several limitations. The study was retrospective and FDG PET was  
7  
8 performed to detect malignancies. The extent of the imaging range was therefore restricted from  
9  
10 the head to the middle of the thighs, limiting evaluation of the thighs; however, a negligible  
11  
12 number of false negatives in vFDG were most likely produced. Nevertheless, we propose that  
13  
14 when FDG PET is conducted in PM/DM patients, scans should include, at least, the entire length  
15  
16 of the thighs to produce more informative data. In this study, we could not study whether FDG  
17  
18 uptake in skeletal muscles changed after immunomodulatory treatment, because only a few  
19  
20 patients underwent FDG PET two times or more. A part of patients underwent FDG PET shortly  
21  
22 after beginning corticosteroid. Manual muscle test (MMT) data were not obtained from all  
23  
24 patients; therefore, we could not compare MMT and FDG PET findings. We were unable to  
25  
26 compare FDG PET findings between PM/DM patients and noninflammatory myopathies, such as  
27  
28 muscular dystrophy.  
29  
30

31  
32 In conclusion, our findings indicated the utility and convenience of FDG PET in the clinical  
33  
34 characterization of PM/DM. The greatest advantage of FDG PET is that it can screen the whole  
35  
36 body in a single scan. Apart from malignancies,<sup>23</sup> this methods can also evaluate lung  
37  
38 inflammation<sup>24</sup> and swelling of lymph nodes. We can visually evaluate the extent and pattern of  
39  
40 muscle lesions systemically and include structures that are not routinely screened by MRI. In  
41  
42 addition, the degree of pathology in muscle can be inferred from the extent of vFDG-psotivity. In  
43  
44 addition, semiquantitative evaluation using SUV is useful for the statistical analysis of muscle  
45  
46 inflammation. On the other hand, the disadvantages of FDG PET include the considerable costs  
47  
48 incurred and exposure to ionizing radiation. It is important to keep in mind that FDG uptake in  
49  
50 muscles is influenced by hyperglycemia, uptake by other organs, and voluntary or involuntary  
51  
52 muscle movement during the uptake phase; therefore, careful examination is a prerequisite.<sup>25</sup>  
53  
54  
55 Although further prospective investigations in a larger sample size are necessary, addition of FDG  
56  
57  
58  
59  
60

PET to conventional clinical examinations may be useful for comprehensive diagnosis and management as well as investigation of the pathological mechanisms underlying PM/DM.

For peer review only



**Acknowledgements**

We would like to thank Risa Ando for her excellent technical assistance. We would like to thank Climson (Enago) Interactive for their English language review.

**Contributions**

MT, KF and TK were involved in study setup and draft writing. TM was involved in the analysis of the muscle biopsies. TK and AA contributed to the visual evaluation of FDG PET. All of the authors contributed to discussion of the data and review and revision of the manuscript.

**Funding**

This study was supported by JSPS KAKENHI Grant Number 25461265 (Japan).

**Competing Interests**

None.

**Ethic approval**

Tohoku University School of Medicine ethics committee.

**Provenance and peer review**

Not commissioned; externally peer reviewed.

**Data sharing statement**

No additional data are available.

## REFERENCES

1. Lazarou IN, Guerne P-A. Classification, diagnosis, and management of idiopathic inflammatory myopathies. *J Rheumatol* 2013;40:550-64.
2. Machado P, Brady S, Hanna MG. Update in inclusion body myositis. *Curr Opin Rheumatol* 2013;25:763-71.
3. Vij R, Strek ME. Diagnosis and treatment of connective tissue disease-associated interstitial lung disease. *Chest* 2013;143:814-24.
4. Engel AG, Hohlfield R. The polymyositis and dermatomyositis syndromes. 1321-1366. In *Myology* 3<sup>rd</sup> ed. Engel AG, Franzini-Armstrong C. 2004 McGraw-Hill.
5. Tansley S, Gunawardena H. The evolving spectrum of polymyositis and dermatomyositis-moving towards clinicoserological syndromes: a critical review. *Clinic Rev Allerg Immunol* 2013. DOI 10.1007/s12016-013-8387-6.
6. Maeda MH, Tsuji S, Shimizu J. Inflammatory myopathies associated with anti-mitochondrial antibodies. *Brain* 2012;1767-77.
7. Tanaka K, Sato A, Kasuga K, *et al.* Chronic myositis with cardiomyopathy and respiratory failure associated with mild organ-specific autoimmune diseases. *Clin Rheumatol* 2007;26:1917-9.
8. Gotthardt M, Bleeker-Rovers CP, Boerman OC, *et al.* Imaging of inflammation by PET, conventional scintigraphy, and other imaging techniques. *J Nucl Med* 2010;51:1937-49.
9. Kubota K, Ito K, Morooka M, *et al.* FDG PET for rheumatoid arthritis: basic considerations and whole-body PET/CT. *Ann N Y Acad Sci* 2011;1228:29-38.
10. Fuchs M, Briel M, Daikeler T, *et al.* The impact of <sup>18</sup>F-FDG PET on the management of patients with suspected large vessel vasculitis. *Eur J Nucl Med Mol Imaging* 2012;39:344-53.
11. Yamashita H, Kubota K, Takahashi Y, *et al.* Whole-body fluorodeoxyglucose positron emission

- 1  
2  
3  
4  
5  
6 tomography/computed tomography in patients with active polymyalgia rheumatica: evidence  
7  
8 for distinctive bursitis and large-vessel vasculitis. *Mod Rheumatol* 2012;22:705-11.  
9
- 10 12. Owada T, Maezawa R, Kurasawa K, *et al.* Detection of inflammatory lesions by F-18  
11  
12 fluorodeoxyglucose positron emission tomography in patients with polymyositis and  
13  
14 dermatomyositis. *J Rheumatol* 2012;39:1659-65.  
15
- 16 13. Pipitone N, Versari A, Zuccoli G, *et al.* <sup>18</sup>F-fluorodeoxyglucose positron emission tomography  
17  
18 for the assessment of myositis: a case series. *Clin Exp Rheumatol* 2012;30:570-3.  
19
- 20 14. Tanaka S, Ikeda K, Uchiyama K, *et al.* [<sup>18</sup>F]FDG uptake in proximal muscles assessed by  
21  
22 PET/CT reflects both global and local muscular inflammation and provides useful information  
23  
24 in the management of patients with polymyositis/dermatomyositis. *Rheumatol* 2013;52:1271-8.  
25  
26
- 27 15. Bohan A, Peter JB. Polymyositis and dermatomyositis. *N Engl J Med* 1975;292:344-7.  
28
- 29 16. Brooks BR, Miller RG, Swash M, *et al.* El Escorial revisited: revised criteria for the diagnosis  
30  
31 of amyotrophic lateral sclerosis. *ALS other Motor Neuron Disord* 2000;1:293-9.  
32  
33
- 34 17. Sobic-Saranovic DP, Grozdic IT, Videnovic-Ivanov J, *et al.* Responsiveness of FDG PET/CT to  
35  
36 treatment of patients with active chronic sarcoidosis. *Clin Nucl Med* 2013;38:516-21.  
37
- 38 18. Hoogendijk JE, Amato AA, Lecky BR, *et al.* 119th ENMC international workshop: trial design  
39  
40 in adult idiopathic inflammatory myopathies, with the exception of inclusion body myositis,  
41  
42 10-12 October 2003, Naarden, The Netherland. *Neuromusc Disord* 2004;14:337-45.  
43  
44
- 45 19. Studýnková JT, Charvát F, Jarošová K, *et al.* The role of MRI in the assessment of  
46  
47 polymyositis and dermatomyositis. *Rheumatol* 2007;46:1174-9.  
48
- 49 20. Yao L, Gai N. Fat-corrected T2 measurement as a marker of active muscle disease in  
50  
51 inflammatory myopathy. *Am J Rheumatol* 2012;198:W475-81.  
52
- 53 21. Degardin A, Morillon D, Lacour A, *et al.* Morphologic imaging in muscular dystrophies and  
54  
55 inflammatory myopathies. *Skeletal Radiol* 2010;39:1219-27.  
56  
57  
58  
59  
60

- 1  
2  
3  
4  
5  
6 22. Hak AE, de Paepe B, de Bleecker JL, *et al.* Dermatomyositis and polymyositis: new treatment  
7 targets on the horizon. *Neth J Med* 2011;69:410-21.  
8  
9  
10 23. Selva-O'Callaghan A, Grau JM, Gámez-Cenzano C, *et al.* Conventional cancer screening  
11 versus PET/CT in dermatomyositis/polymyositis. *Am J Med* 2010;123:558-62.  
12  
13  
14 24. Morita Y, Kuwagata S, Kato N, *et al.* <sup>18</sup>F-FDG PET/CT useful for the early detection of rapidly  
15 progressive fatal interstitial lung disease in dermatomyositis. *Intern Med* 2012;51:1613-8.  
16  
17  
18 25. Jackson RS, Schlarman TC, Hubble WL, *et al.* Prevalence and patterns of physiologic muscle  
19 uptake detected with whole-body <sup>18</sup>F-FDG PET. *J Nucl Med Technol* 2006;34:29-33.  
20  
21  
22  
23  
24  
25  
26  
27  
28  
29  
30  
31  
32  
33  
34  
35  
36  
37  
38  
39  
40  
41  
42  
43  
44  
45  
46  
47  
48  
49  
50  
51  
52  
53  
54  
55  
56  
57  
58  
59  
60

**Figure legends**

**Figure 1.** FDG PET and MRI findings in a patient with dermatomyositis (Patient 11). Serial sections of FDG PET/CT (A). Using FDG uptake in mediastinum blood vessels as a positivity criterion, positive regions were found in the paraspinal muscles, shoulders, upper arms, and lumbar girdles in a predominantly symmetrical distribution. An FDG PET image of the upper arm level (B). Frontal view of an FDG PET image indicating FDG uptake in the shoulders, upper arms, and iliopsoas (C). MRI of the thighs (D) showing high signal areas in the bilateral quadriceps femoris (T2-weighted images with fat suppression).

**Figure 2.** The numbers of vFDG-positive muscle regions are correlated with the mean SUVmax in four extremities (A). Serum values of creatinine kinase (CK) were higher in patients with more than two vFDG-positive muscle regions than in those with two or less regions (B). The number of vFDG-positive muscle regions correlated with the total histological scores (C). The mean SUVmax in four extremities correlated with the total histological scores (D). There were no differences in SUVmax in corresponding muscles between muscles with abnormal MRI signals and those without (E). In muscle regions examined by MRI, SUVmax in the corresponding muscles was higher in vFDG-positive muscles than in vFDG-negative ones (F).

**Figure 3.** FDG PET (A) and MRI findings (B) for both thighs in a patient with PM (Patient 14). Distribution patterns of high signal on MRI and FDG PET are different. The FDG uptake is localized and predominantly within the muscles.

**Figure 4.** The mean SUVmax in four extremities was higher in patients with PM/DM than in those with ALS (A). In patients with PM/DM, SUVmax of bilateral muscles was highly correlated,

1  
2  
3  
4  
5  
6 suggesting symmetrical muscle lesions (B). Correlation coefficients: bilateral quadriceps femoris,  
7  
8  $\rho = 0.91$ ,  $p < 0.0001$ ; bilateral medial and posterior compartments of the thighs,  $\rho = 0.88$ ,  $p$   
9  
10  $< 0.0001$ ; right quadriceps femoris and right medial and posterior compartments of the thighs,  
11  
12  $\rho = 0.58$ ,  $p = 0.0004$ ; left quadriceps and left medial and posterior compartments of the thighs,  
13  
14  $\rho = 0.69$ ,  $p < 0.0001$ . In patients with ALS, only a moderate correlation was found between bilateral  
15  
16 muscles (Spearman rank correlation) (C).  
17  
18  
19  
20  
21  
22  
23  
24  
25  
26  
27  
28  
29  
30  
31  
32  
33  
34  
35  
36  
37  
38  
39  
40  
41  
42  
43  
44  
45  
46  
47  
48  
49  
50  
51  
52  
53  
54  
55  
56  
57  
58  
59  
60

Table 1 Summary of patients with PM/DM

| Clinical findings                     |     |                    |        |      |      |                 | Visually identified FDG uptakes in muscles§ |    |   |   |    |    |   |   |      |              | FDG uptakes in other organs |        |         |          | Muscle biopsy findings¶ |           |              | MRI findings**        |  |  |
|---------------------------------------|-----|--------------------|--------|------|------|-----------------|---------------------------------------------|----|---|---|----|----|---|---|------|--------------|-----------------------------|--------|---------|----------|-------------------------|-----------|--------------|-----------------------|--|--|
| Age                                   | Sex | Clinical diagnosis |        | Dur* | CK†  | Therapy at PET‡ | SCM                                         | PC | S | U | PT | PL | B | T | Lung | Lymph nodes. | Malignancy.                 | others | Sites   | Cell inf | Nec/reg                 | Sites     | High signals | Consistency with vFDG |  |  |
| PM/DM without other collagen diseases |     |                    |        |      |      |                 |                                             |    |   |   |    |    |   |   |      |              |                             |        |         |          |                         |           |              |                       |  |  |
| 1                                     | 24  | M                  | DM     | 1    | 3000 | 5d P80          |                                             |    |   |   |    |    |   |   | ↑    |              |                             |        | BB      | 2        | 3                       | thigh     | (+)          | P (+)                 |  |  |
| 2                                     | 82  | M                  | DM     | 1    | 4307 | 5d P50          |                                             |    |   |   |    |    |   |   |      |              | porta hepatis               |        | BB      | 0        | 1                       | thigh     | (+)          | (-)                   |  |  |
| 3                                     | 52  | F                  | DM     | 4    | 436  | (-)             |                                             |    |   |   |    |    |   |   |      |              |                             |        | BB      | 3        | 3                       | thigh     | (+)          | P (+)                 |  |  |
| 4                                     | 20  | F                  | DM     | 3    | 312  | (-)             |                                             |    |   |   |    |    |   |   | ↑    |              |                             |        | BB      | 0        | 1                       | thigh     | (+)          | (-)                   |  |  |
| 5                                     | 37  | F                  | DM ILD | 1    | 783  | 7d P20          |                                             |    |   |   |    |    |   |   | ↑    |              |                             |        | BB      | 1        | 1                       | thigh     | (+)          | (-)                   |  |  |
| 6                                     | 33  | F                  | DM     | 3    | 51   | (-)             |                                             |    |   |   |    |    |   |   | ↑    |              | stomach, uterus             |        | BB      | 1        | 1                       | Not done  |              |                       |  |  |
| 7                                     | 33  | F                  | DM     | 2    | 274  | (-)             |                                             |    |   |   |    |    |   |   | ↑    |              | marrow, spleen              |        | BB      | 0        | 0                       | Not done  |              |                       |  |  |
| 8                                     | 73  | F                  | DM     | 1    | 182  | (-)             |                                             |    |   |   |    |    |   |   | ↑    |              | stomach                     |        | BB      | 3        | 3                       | Not done  |              |                       |  |  |
| 9                                     | 66  | M                  | DM     | 4    | 239  | (-)             |                                             |    |   |   |    |    |   |   |      |              |                             |        | BB      | 0        | 2                       | should.br | (+)          | (-)                   |  |  |
| 10                                    | 65  | M                  | DM     | 2    | 377  | (-)             |                                             |    |   |   |    |    |   |   | ↑    |              | lung                        |        | Deltoid | 1        | 2                       | brachium  | (+)          | (-)                   |  |  |
| 11                                    | 53  | M                  | DM     | 4    | 2488 | (-)             |                                             |    |   |   |    |    |   |   |      |              |                             |        | BB      | 2        | 2                       | thigh     | (+)          | (-)                   |  |  |
| 12                                    | 25  | F                  | PM     | 4    | 926  | (-)             |                                             |    |   |   |    |    |   |   |      |              |                             |        | BB      | 2        | 0                       | thigh     | (+)          | (-)                   |  |  |
| 13                                    | 76  | F                  | PM ILD | 2    | 1343 | (-)             |                                             |    |   |   |    |    |   |   | ↑    |              |                             |        | BB      | 1        | 3                       | thigh     | (+)          | (-)                   |  |  |
| 14                                    | 54  | M                  | PM ILD | 14   | 6347 | 2d P60          |                                             |    |   |   |    |    |   |   | ↑    |              |                             |        | Gastro  | 1        | 1                       | thigh     | (+)          | P (+)                 |  |  |
| 15                                    | 56  | F                  | PM ILD | 8    | 362  | (-)             |                                             |    |   |   |    |    |   |   | ↑    | ↑            | joints                      |        | QF      | 2        | 1                       | thigh     | (+)          | (-)                   |  |  |
| 16                                    | 55  | F                  | PM     | 12   | 1019 | (-)             |                                             |    |   |   |    |    |   |   | ↑    | ↑            | spleen                      |        | BB      | 1        | 1                       | Not done  |              |                       |  |  |
| 17                                    | 69  | F                  | PM     | 60   | 758  | (-)             |                                             |    |   |   |    |    |   |   |      |              | myocardium                  |        | Deltoid | 1        | 2                       | Not done  |              |                       |  |  |
| 18                                    | 79  | F                  | PM     | 7    | 9627 | (-)             |                                             |    |   |   |    |    |   |   |      |              | lung                        |        | BB      | 0        | 2                       | thigh     | (+)          | (-)                   |  |  |
| 19                                    | 52  | M                  | PM     | 60   | 3372 | 9d P60          |                                             |    |   |   |    |    |   |   |      |              |                             |        | Deltoid | 2        | 1                       | thigh     | (+)          | (-)                   |  |  |
| 20                                    | 40  | F                  | PM     | 2    | 1842 | 7d P60          |                                             |    |   |   |    |    |   |   |      |              |                             |        | BB      | 1        | 2                       | Not done  |              |                       |  |  |

Tateyama et al.<sup>24</sup>

|                                    |    |   |           |    |      |         |  |  |  |  |  |  |  |  |  |  |           |    |                |          |          |      |          |     |      |
|------------------------------------|----|---|-----------|----|------|---------|--|--|--|--|--|--|--|--|--|--|-----------|----|----------------|----------|----------|------|----------|-----|------|
| 21                                 | 50 | F | PM        | 36 | 7182 | (-)     |  |  |  |  |  |  |  |  |  |  | BB        | 0  | 2              | brachium | (-)      | N(+) |          |     |      |
| 22                                 | 73 | M | PM ILD    | 1  | 1377 | 13d P55 |  |  |  |  |  |  |  |  |  |  | diaphragm | BB | 2              | 1        | Not done |      |          |     |      |
| PM/DM with other collagen diseases |    |   |           |    |      |         |  |  |  |  |  |  |  |  |  |  |           |    |                |          |          |      |          |     |      |
| 23                                 | 27 | F | MCTD      | 7  | 200  | 8d P50  |  |  |  |  |  |  |  |  |  |  | ↑         |    | salivary gland | BB       | 2        | 1    | thigh    | (-) | N(+) |
| 24                                 | 72 | F | PM, SSC   | 18 | 1442 | (-)     |  |  |  |  |  |  |  |  |  |  | ↑         | ↑  | pudenda        | BB       | 2        | 1    | brachium | (+) | (-)  |
| 25                                 | 73 | F | PM, SSC   | 14 | 126  | (-)     |  |  |  |  |  |  |  |  |  |  | ↑         |    | thyroid gland. | BB       | 0        | 0    | thigh    | (-) | N(+) |
| 26                                 | 70 | F | PM RA Sjs | 24 | 761  | (-)     |  |  |  |  |  |  |  |  |  |  | ↑         | ↑  |                | BB       | 2        | 2    | thigh    | (+) | (-)  |
| 27                                 | 72 | F | PM CREST  | 36 | 386  | (-)     |  |  |  |  |  |  |  |  |  |  | ↑         |    | joints         | QF       | 2        | 1    | thigh    | (+) | (-)  |
| 28                                 | 42 | M | MCTD      | 3  | 5585 | (-)     |  |  |  |  |  |  |  |  |  |  | ↑         |    |                | BB       | 3        | 3    | thigh    | (+) | (-)  |
| 29                                 | 65 | F | PM Sjs    | 2  | 1764 | (-)     |  |  |  |  |  |  |  |  |  |  | ↑         | ↑  | joints         | BB       | 2        | 2    | thigh    | (-) | N(+) |
| 30                                 | 70 | F | PM RA     | 3  | 1050 | (-)     |  |  |  |  |  |  |  |  |  |  | ↑         | ↑  |                | QF       | 2        | 1    | Not done |     |      |
| 31                                 | 63 | M | PM SSC    | 7  | 1396 | (-)     |  |  |  |  |  |  |  |  |  |  |           |    |                | BB       | 1        | 2    | brachium | (-) | N(+) |
| 32                                 | 52 | F | PM SSC    | 1  | 1142 | (-)     |  |  |  |  |  |  |  |  |  |  | ↑         | ↑  |                | BB       | 0        | 1    | brachium | (+) | (-)  |
| 33                                 | 75 | F | MCTD      | 7  | 2123 | (-)     |  |  |  |  |  |  |  |  |  |  |           |    | peritoneum     | BB       | 2        | 2    | brachium | (+) | P(+) |

\*Duration of illness (months).

†Serum creatine kinase (CK) levels (IU/L).

‡Duration (days, d) and daily dose (mg) of prednisolone (P) at the time of the PET study.

§The regions of positive vFDG at least in either side of the region are filled. vFDG-positivity criterion is described in Material and Methods.

¶The criteria for grading of pathological findings is described in Material and Methods.

\*\*P (+), both PET and MRI showed positive findings; N (+), both PET and MRI were negative; (-), either PET or MRI showed positive findings.

B, buttock; BB, biceps brachii; cell inf, mononuclear cell infiltration; CREST, CREST syndrome; DM, dermatomyositis; Gastro, gastrocnemius; ILD, interstitial lung disease; MCTD, mixed connective tissue disease; nec/reg, muscle fiber necrosis and regeneration; PC, paraspinal muscles at cervical levels; PL, paraspinal muscles at lumbar levels; PM, polymyositis; PT, paraspinal muscles at thoracic levels; QF, quadriceps femoris; RA, rheumatoid arthritis; S, shoulders; SCM, sternocleidomastoid muscles; Sjs, Sjögren syndrome; SSC, systemic sclerosis; T, thighs.
